# Supplementary material
Source: publisher site journal article supplement (https://www.dovepress.com/article/221676)
Supplement: Supplementary file 1 [file get_supplementary_file.php]

**Supplementary data**

***Table S1:* Prognostic value of uPA/PAI-1**

| **Reference** | **N** | **Population** | **Systemic**  **treatment** | **Median follow-up (months)** | | **Primary endpoint(s)** | **Results** | | **Comments** |
| --- | --- | --- | --- | --- | --- | --- | --- | --- | --- |
| **univariate** | **multivariate** |
| **Studies LOE I** | | | | | | | | | |
| Jänicke *et al.*, 2001 [6] | 556 | **N0 T1-2**  HR+ or HR- | - LR*:* observation  - HgR*:* CMF or observation  - No ET | 32 | 3y-DFS | | - ***No CT*** (n = 374)   RR =2.71 (1.3-5.7), *p* = 0.009   - ***HgR patients (ITT)***   RR = 0.58, *p* = 0.17 | ***No CT*** (n = 374)  RR = 2.83 (1.3-6.0), *p* = 0.007 | - Randomized prospective trial  - Results confirmed at 10 years [7] |
| Look *et al.,* 2002 [8] | 8377 | 18 datasets  uPA available in 17 datasets (n = 8175), PAI-1 in 15 datasets (n = 6682), both in 6480 patients  HR+ = 6680 (79.7%)  N0 = 4676 (55.8%) | Yes = 3771 (45%)  No = 4286 (51.2%)  Unknown = 320 (3.8%) | 79 | RFS  OS | | NR | - ***All***(n = 6480)  RFS: χ² = 203.6, p< 0.001  OS: χ² = 212.9, p ≤ 0.001  - ***N0*** (n = 3483)  RFS*:* χ² 116.8, *p* < 0.001  - ***N+*** (n = 2997)  RFS*:* χ² 88.4, *p* < 0.001 | - Pooled analysis  - Data about MFS in Look *et al.*, 2003 [9] |
| **Other studies** | | | | | | | | | |
| Jänicke *et al.,* 1993  [10] | 247 | HR+ = 194 (79%)  N0 = 104 (44%) | - N+  Premenopausal: CT  Postmenopausal: Tam  - N0*:* none | 30 | 3y-DFS (n = 229) | | N0 (n = 101):  LR: 93% ; HgR: 57% ; *p* = 0.0003 | NR | Prospective study |
| Kim *et al.*, 1998 [11] | 130 | **N0**  ER+ = 53 (41%) | CT and/or ET or none | 52.6 | Rate of recurrence | | - Low uPA and PAI-1 (n = 36): 2.8%  - High uPA and PAI-1 (n = 17): 29.4% | NR | Prospective multicentric study |
| Harbeck *et al.*, 1999  [12] | 125 | **N0**  HR+ = 99 (79.2%) | None | 76 | 5y-DFS | | LR: 97% ; HgR: 64%  RR = 11.0 (3.2–37.4) | NR | Cohort study |
| Harbeck *et al.*, 1999 [13] | 316 | N0 = 147 (46.5%)  HR+ = 249 (79%) | CT and/or ET or none | 77 | DFS | | N0:  LR: 92.3%, HgR: 64% | NR | Prospective cohort study |
| Konecny *et al.*, 2001  [14] | 587 | N0 = 283 (48.2%)  ER+ = 394 (67.1%)  HER2- = 480 (81.8%) | CT and/or ET or none | 26 for DFS  32 for MFS | DFS (months) | | LR: 64.3 ± 2.1  uPA low and PAI-1 high: 41.6 ± 2.8  uPA high and PAI-1 low: 52.3 ± 2.3  uPA and PAI-1 both high: 53.7 ± 3.3  *p* = 0.003 (LR *vs* the others) | *p* = 0.0096 |  |
| MFS (months) | | LR: 69.2 ± 1.8  uPA low and PAI-1 high: 56.1 ± 2.2  uPA high and PAI-1 low: 43.5 ± 2.6  uPA and PAI-1 both high: 58.8 ± 3.7  *p* = 0.0002 | *p* =0.0016 |
| Harbeck *et al.*, 2002  [15] | 761 | N0 = 387 (51%)  HR+ = 608 (80%) | CT and/or ET or none | 48 | DFS (RR) | | 1.9 (1.4-2.5), *p*<0.001  - ***N0 without adjuvant systemic therapy***:  4.8 (2.5-9.1),  *p*<0.001 | 1.9 (1.4-2.5), *p*<0.001  - ***N0 without adjuvant systemic therapy***: 3.9 (2.0-7.5),  *p*<0.001 | Prospective study  316 analyzed in Harbeck *et al.,* 1999 [13] |
| OS (RR) | | 2.0 (1.5-2.7), *p*<0.001  - ***N0 without adjuvant systemic therapy***:  3.9 (1.9-7.8), *p*<0.001 | 2.0 (1.4-2.7), *p* <0.001  - ***N0 without adjuvant systemic therapy***:  2.8 (1.4-5.9), *p* = 0.005 |
| Harbeck *et al.*, 2002  [16] | 3424 | N0 = 1736 (50.7%)  2 different datasets | CT and/or ET or none | 83 | 5y-DFS | | LR: 72%, HgR: 54%  *p*< 0.001 | *p*< 0.001, HR = 2.0 (1.8–2.3) | Cohort study |
| Zemzoum *et al.,* 2003 [17] | 118 | **N0**  HR+ = 95 (81%) | None | 126 | DFS | | LR: 90.6% ; HgR: 49.0%  RR = 8.3 (3.4-20.4), *p*<0.001 | RR = 5.4 (1.9-14.8), *p*<0.001 | Cohort study |
| Descotes *et al.,* 2008  [18] | 732 | N0 = 411 (56%)  ER+ = 564 (77%) | CT (n = 67, 98%) or ET (n = 296, 40%) or both (n = 256, 35%) or none (n = 107, 15%) | 51 | MFS | | clinical relevance of PAI-1 is not improved by uPA  - PAI-1: HR = 3.1, *p*< 0.001  - UPA: HR = 2.6, *p* = 0.006 | uPA: NS  PAI-1: HR = 2.4, *p* = 0.002 | Cohort study |
| De Cremoux *et al.,* 2009  [19] | 169 | **N0**  ER+ = 151 (89.9%) | - No adjuvant CT  - Tam (n = 30, 18%) | 73 | DFS  (+ LRR, MFS, OS) | | - DFS: *p* = 0.15  (uPA: RR = 2.76 (1.37-5.56), *p*= 0.003)  - MFS: *p* = 0.002  LR: 100%, HgR: 80%  - LRR*:* NS | MFS: *p* = 0.002 | Retrospective study |
| Borstnar *et al.,* 2010  [20] | 180 | ER+ = 159 (88.3%)  N0 = 14 (7.8%) | Anthracycline-based CT (n = 80, 44%) or CMF (n = 100, 56%)  +/- ET (n = 133, 74%) | 37 | 3y-DFS | | LR 86% , HgR 78.7%, *p* = 0.157  - CMF  LR: 87.1%, HgR: 77.0%  *p* = 0.044, HR = 2.81 (0.98–8.04)  - Anthracycline-based  LR: 85.2%; HgR: 81.8%  *p* = 0.807, HR = 0.88 (0.33–2.40) | NR | Retrospective study |
| Kolben *et al.,* 2016  [21] | 381 | **N0, ER+, Grade 2** | Adjuvant CT upon consideration of  prospectively measured uPA/PAI-1  - CT*:* 40.9% of the whole population, 13.5% of LR and 63.3% of HgR  - ET 97.4% | 52.5 | 5y-DFS  5y-OS | | **- *Whole population without CT****:* DFS 99% (98.98–99.02) ; OS 95%(94.96–95.04)  **- *CT:***  - HgR: DFS 95.7 % (95.65–95.72) ; OS 97% (96.97–97.03)  - LR: DFS 82.5% (82.31–82.69) ; OS 100%  DFS: *p* = 0.190 ; OS: *p* = 0.544  - ***no CT****:*  -HgR: DFS 100% ; OS 92% (91.93–92.07)  - LR: DFS 98.9% (98.88–98.92) ; OS 96.9% (96.86–96.93)  DFS: *p* = 0.462 ; OS: *p* = 0.014 | NR  ***HgR + CT****:* HER2+ 11.3%, median age 57y, median Ki67 20%  ***HgR + no CT****:* HER2+ 2.6% (*p* = 0.034), median age 64y (*p*< 0.001) , median Ki67 15 % (*p* = 0.02) |  |
| Dovnik *et al.*, 2017  [22] | 858 | **N0**  ER+ = 674 (78.6%)  HER2+ = 151 (17.6%) | - CT (n = 132, 15%) (79.2% anthracycline-based, majority of the others CMF)  - ET (n = 522, 61%) (28.9% tam, 52.7% AI, both %)  - both CT and ET (n = 133, 16%)  - trastuzumab 6.4% of all patients and 35.8% of HER2+ patients | 100 | DFS (HR) | | LR: 88.1%, HgR: 75.1%  2.16 (1.23–3.72), *p* = 0.005 | N = 273 patients only  1.76 (0.89–3.49), *p* = 0.106 | Retrospective study |
| OS (HR) | | LR: 91.9%, HgR: 82.1%  2.73 (1.33–5.58), *p* = 0.006 | N = 273 patients only  1.98 (0.83–4.76), *p* = 0.126 |
| Viala *et al.*, 2017  [23] | 520 | **ER+, HER2-, N0** | taking prospectively into account uPA/PAI-1  - CT (anthracycline + taxane)*:* 46.5% of the whole population, 26% of LR and 60.3% of HgR  - ET 98.3% | 64.8 | 5 and 10y-RFS (%)  5y-OS (%) | | - LR*:*  5y-RFS: 94 (89-96)  10y-RFS: 86 (76-92)  - HgR*:*  5y-RFS: 96 (93-98)  10y-RFS: 91 (85-95)  - LR *vs*HgR*:* NS (*p* = 0.304)  - whole population*:*  5y-RFS: 95 (92-96)  10y-RFS: 88.7 (83-92)  5y-OS: 98 | NA |  |

Abbreviations: HR hormone receptor, ER estrogen receptor, LR low risk, HgR high risk, N0 node negative, N+ node positive, CT chemotherapy, ET endocrine therapy, Tam Tamoxifen, AI aromatase inhibitor, CMF cyclophosphamide + methotrexate + fluorouracil, y year, DFS disease-free survival, RFS recurrence-free survival, OS overall survival, MFS metastasis-free survival, LRR loco-regional recurrence, NR not reported, NS no significant, NA not applicable, LOE level of evidence

***Table S2:* Prognostic value of Oncotype DX®**

| **Reference** | **N** | **Population** | **Systemic treatment** | **Median follow-up (months)** | **Primary endpoint(s)** | **Results** | | **Comments** |
| --- | --- | --- | --- | --- | --- | --- | --- | --- |
| **Univariate analysis** | **Multivariate analysis** |
| **Adjuvant, prospective studies** | | | | | | | | |
| Sparano *et al.*, 2015 [24] | 1626 | **HR+** (ER+, n = 1621), **HER2-, N0, 1.1- 5 cm or 0.6-1.0 cm and intermediate or high grade,**  **RS 0 to 10** | -ET alone*:*  AI (n = 963, 59%), Tam (n = 560, 34%), Tam + AI (n = 13, 0.8%), ovarian-function suppression (n = 44, 2.7%), other or unknown therapy (n = 46, 2.8%) | 69 | 5y-DFS (%, 95% CI) | 93.8 (92.4-94.9) | NR | - Prospective randomized trial  - Modification of the LR group (RS ≤ 10) |
| Sparano et al., 2018 [25] | 6711 | **HR+ (ER+, n = 6702), HER2-, N0, 1.1- 5 cm or 0.6-1.0 cm and intermediate or high grade,**  **RS 11 to 25** | -ET alone (n = 3399)  -ET + CT (n = 3312) | 90 | 9y-DFS (%) | - ET alone   83.3±0.9   - ET + CT:   84.3±0.8 | NR |  |
| Glutz*et al.*, 2016  [26] | 2642 | **N+ or high-risk N-** (T2, grade 2 and 3, high uPA/PAI-1, or age < 35y ), HR + **HER2-**  ER + = 2,390 (90.5%)  LR = 459 (17.4%)  IR = 1,544 (58.4%)  HgR = 550 (20.8%)  Unknown = 89 (3.4%) | No CT if RS ≤ 11 (n = 348, 15.3%) | 35 | 3y-DFS (%, 95% CI) | HgR: 91.9 ( 89.0- 94.8)  IR: 97.8 (96.8-98.8)  LR: 97.4 (95.6-99.1)  *p*< 0.001 |  | - Prospective trial  - LR defined by RS ≤ 11  HgR defined by RS > 25 |
| RS fractionally ranked (75th-25th percentile)  HR = 2.31 (1.52-3.52), *p*< 0.001 | HR = 1.68 (1.04-2.74), *p* = 0.035 |
| **Adjuvant, retrospective studies** | | | | | | | | |
| Paik *et al.*, 2004 [27] | 668 | **ER+, N0**  HER2+ = 55 (8.2%)  LR (51%), IR (22%), HgR (27%) | Tam (5 or 10y) | 120 | 10y-DRFS (%, 95% CI) | - LR: 93.2 (90.4-96) - IR: 85.7 (79.7-81.7) - HgR: 69.5 (62.6-76.4) - *p*< 0.001 | HR = 2.81 (1.70–4.64), *p*< 0.001 | patients from a prospective trial (NSABP trial B14) |
| Esteva*et al.*, 2005 [28] | 149 | **N0**  ER+ = 103 (69.1%)  HER2+ = 25 (16.8%)  LR = 47 (32%), IR = 21 (14%), HgR = 81 (54%) | None | 216 | 5y-DRFS | NS | NA | Retrospective study |
| Paik *et al.*, 2006 [29] | 651 | **ER+, N0**  LR = 353 (54.2%)  IR = 134 (20.6%)  HgR = 164 (25.2%)  HER2+ = NR | Tam (n = 227, 35%)  or tam + CT (CMF or MF) (n = 424, 65%) | 120 | 10y-DRFS (%, 95% CI) | - ***Tam alone***:   - LR: 96.8 (93.7-99)  - IR: 90.9 (82.5-99.4)  - HgR: 60.5 (46.2-74.8)   - ***Tam + CT****:*   - LR: 95.6 (92.7-98.6)  - IR: 89.1 (82.4-95.9)  - HgR: 88.1 (82.0-94.2) | NR | - Patients from a prospective trial (NSABP trial B20)  - Tamoxifen arm of B20 trial had been analyzed as a training set in the development of the Oncotype DX® assay |
| Interaction RS and CT benefit (RR of CT, 95% CI) | LR: 1.31 (0.46-3.78)  IR: 0.61 (0.24-1.59)  HgR: 0.26 (0.13-0.53)  *p* = 0.038 |
| Habel*et al.*, 2006[30] | 790 | **N0**  ER+ = 682  HER2+ = NR  N = 220 cases  LR = 57 (26%)  IR = 54 (24.5%)  HgR = 109 (49.5%)  N = 570 controls  LR = 322 (56%)  IR = 108 (19%)  HgR = 140 (25%) | - No CT  - Tam (n = 241, 31%), median duration 4y | 120 | 10y-BCSS (%, 95% CI) | ER + (n = 566)   - ***Tam*** (n = 205)   - LR:97.2 (96.1-98.3)  - IR:89.3 (85.1-93.7) (RR4.0 [1.8–8.8])  - HgR:84.5 (77.2-92.4) (RR6.2 [2.4–15.8])   - ***No tam*** (n = 361)   - LR:93.8 (92.1-95.5)  - IR:82.2 (76.7-88.2) (RR2.7 [1.5–5.0])  - HgR:80.1 (74.8-85.8) (RR3.3 [1.8–5.9]) | - ER+  RS continuous for 50-unit increments  • ***Tamoxifen treated*** (n = 205)  RR = 5.3 (1.6–17.2), *p* = 0.003  • ***Tamoxifen untreated*** (n = 361)  RR =2.4 (1.1–5.2), *p* = 0.025 | Case-control study (controls matched to cases according to age, race, adjuvant tam, medical facility and diagnosis year) |
| Goldstein *et al.*, 2008 [31] | 465 | **HR+, 0-3 N**  HER2+ = 76 (16%)  N0 56.5%  1 N+ 24.0%  2-3 N+ 19.6%  LR = 198 (46%)  IR = 142 (30%)  HgR = 125 (24%) | 4 AC or docetaxel  + Tam or AI (5y) | 75.6 | - 5y-DFS (%, 95% CI)  - continuous RS*:* HR for a 50-point difference | LR*:*  0-1 N*:* 96.7 (95-97.8)  2-3 N*:*92.1 (86.9-95.7)  Continuous RS: *p*< 0.001 | HR for continuous RS = 2.12 (0.97-4.65)  *p* = 0.06 (NS) | - Patients from a prospective trial (trial E2197)  - HER2- tumors (n = 389): RS not predictive |
| Espinosa *et al.*, 2009 [32] | 153 | **HR+**  N+ = 57 (37.3%)  HER2+ = NR  LR = 60 (39.2%)  IR = 21 (13.7%)  HgR = 72 (47.1%) | - tam 5y  - CT in N+ or N0 patients with poor prognostic features (anthracycline based n = 55, CMF n = 42) | 91 | 5y-DMFS (%) | -LR: 98  -IR: 81  -HgR: 69  *p*< 0.001 | LR *vs* IR  HR = 4.466 (0.787- 25.331), *p* = 0.091 (NS)  LR *vs*HgR  HR = 8.180 (1.767- 37.861), *p* = 0.007 | Retrospective study |

| Yorozuya*et al.*, 2010 [33] | 40 | |  | **ER+, N0, stage I or IIA**  HER2+ = 2 (5%)  Cases  LR = 3 (30%)  IR = 1 (10%)  HgR = 6 (60%)  Controls  LR = 19 (63%)  IR = 8 (27%)  HgR = 3 (10%) | ET (n = 35, 88%), CT (n = 5, 22%) | 53.4 | Association RS and distant metastasis | - *Metastasis:*   mean RS value: 40.0 (21.1–58.9)   - *Non metastasis:*   Mean RS value: 17.8 (13.8–21.9)   - *p*< 0.001 | RS ≥ 50 *vs* RS < 50*:*  NS (*p* = 0.579) | Case–control study  patients matched on age 1/3 |
| --- | --- | --- | --- | --- | --- | --- | --- | --- | --- | --- |
| Albain*et al.*, 2010  [34] | 367 | |  | **postmenauposal, N+, HR+**  ER+ = 355 (96.7%)  HER2+ = 43 (11.7%)  LR =146 (39.8%)  IR =103 (28.1%)  HgR =118 (32.1%) | Tam (5y) or CAFx6 + Tam | 108 | 10y-DFS (%) | - Tam alone*:*   LR: 60  IR: 49  HgR: 43   - CAF + tam*:*   LR: 64  HgR: 55 | - Tam alone   - categorical*:*  *p* = 0.017  - continuous*:*  HR = 2.64 (95% CI 1.33-5.27; *p* = 0.006) for a 50 point difference | - Patients from a prospective trial (trial S8814) - 0-5y*:* HR 5.55 (2.32-3.28), *p*< 0.001   After 5y*:* NS (HR = 0.86, *p* = 0.80)   - degree of CAF   benefit depends on the RS*:* LR (*p* = 0.97; HR = 1.02 [0.54–1.93]), IR (*p* = 0.48; HR = 0.72 [0.39–1.31]), HgR (*p* = 0.033; HR = 0.59 [0.35–1.01]) |
| Mamounas*et al.,*2010  [35] | 1674 | |  | **ER+ N0** | Tam only (5 to 10y) (n = 895, 53%) or CAF + Tam (n = 424, 25%) or placebo (n = 355, 21%) | 150 | 10y-LRR rate (%) | - ***Tam****:*   LR:4.3 (2.3-6.3)  IR:7.2 (3.4-11.0)  HgR:15.8 (10.4-21.2)  *p* = 0.001   - ***placebo****:*   LR:10.8 (5.8-15.8)  IR:20.0 (9.9-30.0)  HgR:18.4 (9.5-27.4)  *p* = 0.022   - ***CT + Tam****:*   LR1.6 (0.0-3.5)  IR2.7 (0.0-6.4)  HgR7.8 (2.6-13.0)  *p* = 0.028 | - Tam   (continuous RS increment of 50 units)*:*  HR = 2.16 (1.26-3.68), *p* = 0.007 | Patients from prospective trials (NSABP B-14 and B-20) |
| Dowsett*et al.,* 2010 [36] | 1231 | |  | **HR+, post-menopausal**  N0 = 872 (70.8%)  HER2+ = NR  ***- N0:*** LR = 513 (59%) IR = 229 (26%)  HgR = 130 (15%)  ***- N+:*** LR = 160 (52%)  IR = 94 (31%)  HgR = 52 (17%) | Tam or anastrozole (5y)  no CT | 102 | TTDR  for a 50-point change of RS | NR | - ***N0****:*   HR = 3.92 (2.08-7.39)  Δχ2 = 15.5  *p*< 0.001   - ***N+****:*   HR = 3.47 (1.64-7.38)  Δχ2 = 9.4  *p* = .002 | Patients from a prospective trial (ATAC trial) |
| Toi *et al.,* 2010[37] | 200 | |  | **ER+, cT1-T2, N0**japanese population  HER2+ = NR  LR =95 (48%)  IR =40 (20%)  HgR =65 (32%) | Tam (duration?) | 120 | TTDR  HR for continuous RS and a 50-point increase | HR = 6.20 (2.27-17.0), *p*< 0.001 | HR = 6.03 (2.17-16.7), *p*< 0.001 | - Retrospective study  - 10y-DRFS  LR: 3.3% (1.1-10.0)  IR: 0%  HgR: 24.8% (15.7-37.8)  *p*<0.001 (LR *vs*HgR) |
| Sun *et al.,* 2011 [38] | 93 | |  | **HR+** (ER+ n = 85, 91.4%), chinese population  N0 = 57 (61.3%)  HER2+ = 6 (6.5%)  LR = 34 (36.5%)  IR = 29 (31.2%)  HgR = 30 (32.3%) | - CT (n = 75, 81%)   (anthracycline-based regimens)   - ET (n = 70, 75%)   (Tam or AI or both) | 65.9 | DRFS*:* Recurrence rates (%) | ***N0 LR*:** 5y:15.6 (8.4–22.8),  10y:42.1 (25.6–58.6)  ***N0 IR*:** 5y:27.4 (16.9–37.9),  10y: 57.0 (37.7–76.3)  ***N0 HgR***: 5y:58.3 (44.1–72.5),  10y: 79.2 (62.8–95.6)  ***N+ LR*:** 5y:37.5 (20.4–54.6),  10y:37.5 (20.4–54.6)  ***N+ IR*:** 5y:33.3 (17.6–49.0),  10y:66.7 (41.9–91.5)  ***N+ HgR*:** 5y:83.3 (74.5–92.1)  10y:83.3 (74.5–92.1)  LR *vs*HgR*:*χ2 = 20.14, *p*< 0.001  IR *vs*HgR*:*χ2 = 8.57, *p* = 0.003  Continuous RS: *p*< 0.001; HR = 2.35 (1.58–3.49) to an increment of 50 | - ***N+****:*   HR = 1.03 (1.00–1.07)  *p* = 0.039   - ***N0****:*   HR = 1.03 (1.01–1.06)  *p* = 0.017 | Retrospective study |
| Prat *et al.*, 2012  [39] | 1380 | |  | **ER+**  HER2+ (PAM50 subtype) = 100 (7%)  N0 = 610 (47%)  %LR, IR, HgR: NR | Tam only | 102 | DRFS | - ***N0***   LR: 95%  Continuous HR = 1.97, *p*< 0,0001  Categorical HR = 3.79, *p* = 0.0023   - ***N+***   LR: 81%  Continuous HR = 1.51 *p* = 0,01 Categorical LR+IR *vs*HgR: HR = 4.67 *p* = 0.01 | NR | Retrospective study |
| Solin*et al.*, 2012  [40] | 388 | |  | **1–3 N+ or N0 and T>1.0 cm**  HER2+ = 58 (15%)  LR =87 (27%)  IR =67 (20%)  HgR =234 (53%) | - CT (AC or AT)  - ET if HR+ (n = 214, 55%) | 116.4 | 10y-LRR | NS | NA | Patients from a prospective trial (ECOG E2197) |
| Naoi *et al.,* 2013  [41] | 459 | |  | **ER+ N0**  LR = 286 (62%)  IR = 81 (18%)  HgR = 92 (20%)  HER2+ = missing data | ET 5y | NR | RFS | LR *vs* IR*:p* = 0.0014  LR *vs* HR*:p* = 1.7e-11 | NR | Retrospective study |
| Tobin *et al.*, 2014  [42] | 253 | |  | Uppsala cohort ER+ = 215 (85.0%)  LR = 93 (36.7%)  IR = 49 (19.4%)  HgR = 111 (43.9%)  HER2+ = NR | CT (n = 24, 9%), ET (n = 79, 31%) or both (n = 4, 2%) or none (n = 141, 56%) | NR | 21y-BCSS | *p* = 0.004  HR LR *vs* IR+HgR*:* 2.57 (1.43–4.62) | HR = 2.07 (1.12–3.85) (*vs* Ki67) | Cohort study |
| 159 | |  | Stockholm cohort  ER+ = 130 (81.8%)  LR = 50 (31.4%)  IR = 25 (15.7%)  HgR = 84 (52.9%)  HER2+ = NR | CT (n = 12, 8%), ET (n = 96, 60%) or both (n = 18, 11%) or none (n = 33, 21%) | NR | BCSS | HR = 2.87 (1.43–5.75) | HR = 4.62 (1.67–12.74) |  |
| Jonsdottir*et al.*, 2014  [43] | 94 | |  | **N0**  ER+ = 77 (81.9%)  LR = 18 (19.1%)  IR = 42 (44.7%)  HgR = 34 (36.2%)  HER2+ = 14 (14.9%) | ET (n = 13, 14%), CT (n = 10, 11%) | 127 | 14y-DMFS (%) | LR: 83  IR: 79  HgR: 68  NS (*p* = 0.52) | NR | Retrospective study |
| Jegadeesh*et al.*, 2015 [44] | 163 | |  | **ER+**  LR (RS ≤ 25) = 131 (80.3%)  HgR (RS > 25) = 32 (19.7%)  HER2+ = NR | - CT if RS > 31 (n = 47, 29%) (Taxane-based [n = 33], anthracycline-based [n = 11], CMF [n = 1]) + ET | 68,2 | LRR  HgR*vs* LR | NS | NA | - Retrospective study  - RS > 24 predicting for a higher rate of LRR (*p* = 0.04) |
| Le Du *et al.*,2015  [45] | 1030 | |  | **ER+ HER2-**  **T1**  LR = 571 (55.5%)  IR = 370 (35.9%)  HgR = 89 (8.6%) | ET (n = 722, 70%), CT (n = 2, 0.2%)  both (n = 266, 26%), none (n = 17, 1.7%), missing data (n = 23, 2%) | 38.4 | 5y-DMFS (%) | HgR: 76.4, (59.2-87.1)  LR: 95.9 (93.0-97.6)  *p*< 0.0001 | NS | Retrospective study |
| Wen *et al.,* 2017  [46] | 1406 | |  | **N0, ER+, HER2-**  **RS < 18** | ET (n = 1361, 97%), CT (n = 170, 12%) | 46 | 5y-DMFS (%) | 99.6 | NR | Retrospective single-institution study |
| Mamounas*et al.,* 2017 [47] | 1065 | |  | **N+ ER+**  HER2+ = NR  LR =386 (36.2%)  IR =364 (34.2%)  HgR =315 (29.6%) | CT (AC X 4 *vs* AC X 4 followed by paclitaxel X 4) plus Tam 5y  (NSABP B-28) | 134.4 | 10y-LRR cumulative incidence (%, 95% CI) | LR: 3.3 (1.8-5.4)  IR: 7.2 (4.8-10.2)  HgR: 12.2 (8.8-16.1)  p < 0.001 | For a 50-unit increment in RS: HR = 2.59 (1.28-5.26), *p* = 0.008 | Patients from a prospective trial |
| Barcenas*et al.*, 2017 [48] | 1424 | |  | **HR+, HER2-, N0**  LR = 297 (20.8%)  IR = 894 (62.8%)  HgR = 233 (16.4%) | CT (n = 310, 22%), ET (n = 1302, 91%) | 58 | 5y-IDFS (%, 95% CI) | IR group:  92.6 (89.6-94.7) |  | - Retrospective single-institution study  - HRs of the effect of chemotherapy in IR group were NS *:* 1.64 for DFS (95% CI, 0.73-3.71), 1.46 for RFS (95% CI, 0.41-5.23), 1.25 for DMFS (95% CI, 0.32-4.92), and 2.19 for OS (95% CI, 0.44-11.0)  *-* ***cutoffs:***LR: RS ≤ 10, IR: RS 11- 25, HgR: RS > 25 |
|  | | **Neoadjuvant** | | | | | | | | |
| Gianni *et al.,* 2005  [49] | 89 | |  | ER + = 52 (58.4%)  HER2+ = NR  only continuous RS | paclitaxel and doxorubicin every 3 weeks x 3 + 12 weekly paclitaxel | NA | pCR | association *p* = 0.005 | NR |  |
| Chang *et al.,* 2008[50] | 72 | |  | ER+ = 47 (65.3%)  HER2+ = 7 (13.5%)  cN+ = 7 (10%)  continuous RS | Docetaxel 4 cycles | NA | clinical complete response (RECIST criteria) | OR for 50 unit change in RS*:*  5.0 (1.3, 6.0)  *p* = 0.008 | NR |  |
| Akashi-Tanaka *et al.,* 2009  [51] | 43 | |  | **Post-menopausal, ER+, PR+**  N0 = 12 (28%)  HER2+ = NR  LR = 11 (26%)  IR = 16 (37%)  HgR = 16 (37%) | Tam or anastrozole 4 months | 45 | clinical response rate (%) (measuring their size in two dimensions with calipers) | LR: 64  IR: 31  HgR: 31  *p* = 0.11 | NR | 5y-RFS*:*  LR: 100%, IR: 84%, HgR: 73%; *p* = 0.14 |
| Ueno *et al.,* 2014  [52] | 52 | |  | **ER+ post-menopausal**japanese population  HER2+ = 2 (3.1%)  LR = 32 (50.0%)  IR = 17 (26.6%)  HgR = 15 (23.4%) | Exemestane 24 weeks | NA | clinical response rate (RECIST) (%) | - Categorical  LR: 59.4  IR: 58.8  HgR: 20.0  OR = 0.171 (0.040-0.728); *p* = 0.017  - Continuous  OR = 0.205 (0.044-0.946); *p* =0.042 | NR |  |
| Yardley *et al.,* 2015 [53] | 168 | |  | **HER2-**  ER+ = 92 (55%)  cN+ = 111 (66%)  LR = 20 (14%)  IR = 23 (17%)  HgR = 95 (69%) | phase II trial of ixabepilone and cyclophosphamide, 6 cycles | 39 | pCR (%) | LR-IR: 0  HgR: 26  *p* = 0.002  ER+ HgR: 17  ER- HgR: 31 | NR | All ER- patients were in HgR group |
|  | 2y-OS (%) | LR: 100 (78-100)  IR: 100 (78-100)  HgR: 80 (69-93)  *p* = 0.035 | RS, 50 points difference  HR = 20.58 (1.89 to 224.2), *p* = 0.013 |
| Soran*et al.,* 2016  [54] | 60 | |  | **ER+ HER2- T1-3**  **N0-1**  LR =27 (45%)  IR =10 (17%)  HgR =23 (38%) | AC-T | NA | Clinical response rate | NS (categorical RS: *p* = 0.21, continuous RS: *p* = 0.7) | NA |  |

Abbreviations: RS recurrence score, HR hormone receptor, ER estrogen receptor, LR low risk, IR intermediate risk, HgR high risk, N0 node negative, N+ node positive, CT chemotherapy, ET endocrine therapy, Tam Tamoxifen, CMF cyclophosphamide + methotrexate + fluorouracil, MF methotrexate + fluorouracil, AC anthracycline + cyclophosphamide, CAF cyclophosphamide + anthracycline + fluorouracil, y year, DFS disease-free survival, RFS recurrence-free survival, DRFS distant recurrence-free survival, OS overall survival, MFS metastasis-free survival, BCSS breast cancer specific survival, DMFS distant metastasis-free survival, DMFI distant metastasis-free interval, IDFS invasive disease-free survival, TTDR time to distant recurrence, LRR loco-regional recurrence, pCR pathological complete response, NR not reported, NS no significant, NA not applicable, NSABPNational Surgical Adjuvant Breast and Bowel Project, ATACArimidex Tamoxifen Alone or in Combination.

***Table S3:* Prognostic value of MammaPrint®**

| **Reference** | **N** | **Population** | **Systemic**  **treatment** | **Median follow-up (months)** | **Primary endpoint(s)** | **Results** | | **Comments** |
| --- | --- | --- | --- | --- | --- | --- | --- | --- |
| **univariate** | **multivariate** |
| **Adjuvant, prospective randomized trial** | | | | | | | | |
| Cardoso *et al.,* 2016  [55] | 1550 | **HgR clinical (AOL modified version) and LR genomic (MammaPrint®)**  **T1-3, 0 to 3 N**  HR + (ER and/or PR) = 1520 (98.1%)  HER2+ = 124 (8.0%) | - LR clinical and genomic: no CT  - HgR clinical and genomic: CT  - discordant risk results: randomization between genomic risk or clinical risk to determine the use of CT  - no detail about ET | 60 | 5y-DMFS (%) | ***No CT*** (n = 644, primary test population)*:*  94.7 (92.5-96.2)  ***ITT***  - CT (n = 749): 95.9 (94.0-97.2)  - No CT (n = 748): 94.4 (92.3-95.9)  HR = 0.78 (0.50-1.21), *p* = 0.27 | NR | MINDACT |
| 6693 | A) LR = 2745 (41.0%)  B) HgR = 1806 (27.0%)  C) HgR clinical LR genomic = 1550 (23.2%)  D) LR clinical HgR genomic = 592 (8.8%) |  | 60 | 5y-DMFS (%) | A) 97.6 (96.9-98.1)  B) 90.6 (89.0-92.0)  D) 94.8 (92.4-96.4) | D) CT*:* 95.8 (92.9-97.6)  No CT*:* 95.0 (91.8-97.0)  HR = 1.17 ( 0.59- 2.28), *p* = 0.66 |  |
| **Adjuvant, other studies** | | | | | | | | |
| Van de Vijver*et al.,* 2002  [56] | 295 | **pT1-pT2, <53y**  N0 = 151 (51.2%)  ER+ = 226 (76.6%)  HER2+ = NR  PP = 180 (61.0%)  GP = 115 (39.0%) | CT (n = 90, 31%), ET (n = 20, 7%) or both (n = 20, 7%) | 80.4 | DMFS (%) | - ***Whole population***   *- GP*  5y: 94.7 +/- 2.1  10y: 85.2 +/- 4.3  *- PP*  5y: 60.5 +/- 3.8  10y: 50.6 +/- 4.5  HR = 5.1 (2.9- 9.0), *p*< 0.001   - ***N0***   *GP*  - 5y: 93.4 +/- 3.2  - 10y: 86.8 +/- 4.8  *PP*  -5y: 56.2 +/- 5.5  -10y: 44.1 +/- 6.3   - ***N+***   *GP*  - 5y: 95.2 +/- 2.6  - 10y: 82.7 +/- 7.8  *PP*  - 5y: 66.3 +/- 7.8  - 10y: 56.7 +/- 6.4 | HR = 4.6 (2.3-9.2), *p*< 0.001 | - Retrospective study  - 61 of the N0 patients were also part of the study used to establish the prognosis profile [57] |
| Buyse*et al.,* 2006  [58] | 302 | **T1-T2, N0, < 61y**  ER+ = 212 (70.2%)  HER2+ = NR  PP = 191 (63.2%)  GP = 111 (36.8%) | None | 163.2 | DMFS | HR = 2.32 (1.35-4.00),*p* = 0.002 | HR = 2.13 (1.19-3.82) | - Retrospective study (TRANSBIG)  - The ability of the gene signature to identify those who will develop distant relapse is greatest within 5y of diagnosis |
| DFS | HR = 1.50 (1.04-2.16), *p* = 0.032 | HR = 1.36 (0.91-2.03) |
| OS | HR =2.79 (1.60-4.87), *p*< 0.001  ***At 10y*** (%)  - Clinical LR-signature LR: 88 (74- 95)  - Clinical HgR-signature LR: 89 (77- 95)  - Clinical LR-signature HgR: 69 (45- 84)  - Clinical HgR-signature HgR: 0.69 (61-76) | HR = 2.63 (1.45-4.79) |
| Nuyten*et al.,* 2006  [59] | 161 | **T1-T2**  N0 = 90 (55.9%)  ER+ = 121 (75.2%)  HER2+ = NR  PP = 97 (60.2%)  GP = 64 (39.8%) | CT (n = 58, 36%), ET (n = 18, 11%) | 92.3 | Local recurrence | NS | NA | Retrospective study |
| Thomassen*et al.,* 2007  [60] | 60 | **N0, T1-T2, G1, ER+, >35y**  HER2+ = NR  PP = NR  GP = NR | None | 147.6 | Probability of poor outcome | Metastases (n = 30): 0.63  Non-metastases (n = 30): 0.46 | NR | Retrospective study  Comparison HUMAC32 |
| Mook*et al.,* 2009  [61] | 241 | **1-3 N, T1-3, < 71y**  ER+ = 191 (79.3%)  HER2+ = 37 (15.4%)  PP = 142 (58.9%)  GP = 99 (41.1%) | According to national guidelines  CT (n = 53, 22%), ET (n = 91, 38%) or both (n = 75, 31%) | 93.6 | 10y-DMFS (%) | GP: 91 (SE 4%)  PP:76 (SE 4%) | NS (*p* = 0.05, HR = 2.99 [0.996–8.99]) | Retrospective study |
| 10-y BCSS (%) | GP: 96 (SE 2%)  PP: 76 (SE 4%) | HR = 7.17 (1.81 to 28.43), *p* = 0.005 |
| Bueno-de-mesquita*et al.*, 2009  [62] | 123 | **pT1-T2, N0**  ER+ = 94 (76%)  HER2+ = 9 (7%)  PP = 59 (48%)  GP = 64 (52%) | CT (n = 18, 15%), ET (n = 14, 11%) or both (n = 13, 11%) | 69.6 | 5y-DMFS (%) | PP: 78 ± 6%  GP: 98 ± 2%  HR = 5.7 (1.6–20), *p* = 0.007 | HR = 4.8 (1.3–17), *p* = 0.018 | Retrospective study |
| 5y-OS (%) | PP: 82 ± 5%  GP: 97 ± 2%  HR = 3.4 (1.2–9.6), *p* = 0.021 | HR = 3.0 (1.0–8.9), *p* = 0.044 |
| 151 | **pT1-T2, N0**  ER+ = 109 (72%)  HER2+ = NR  PP = 91 (60%)  GP =60 (40%) |  | 122.4 | 10y-DMFS (%) | PP: 50 ± 6%  GP: 86 ± 5%  HR = 5.5 (2.5–12), *p*< 0.01 | HR = 5.3 (2.4–12), *p*< 0.001 | Update [56] |
| 10y-OS (%) | PP: 51 ± 5%  GP: 94 ± 3%  HR = 10.7 (3.9–30), *p*< 0.01 | HR = 9.6 (3.4–27), *p*< 0.001 |
| Espinosa *et al.,*2009  [32] | 153 | **HR+**  N0 = 96 (62.7%)  HER2+ = NR  PP = 70 (45.8%)  GP = 83 (54.2%) | - Tam 5y  - CT 63% (N+ or in N0 patients with poor prognostic features: anthracycline based n = 55, CMF n = 42) | 91 | DMFS (%) | GP: 95  PP: 66  *p*< 0.001 | HR = 3.506 (1.331 - 9.229), *p* = 0.011 | Retrospective study |
| Mook*et al.,* 2010  [63] | 148 | **Post-menopausal, T1-T2, N0, 55 -70y**  ER+ = 116  HER2+ = NR  PP = 57 (39%)  GP = 91 (61%) | - No CT  - ET 18% (Tam, median duration 2y) | 150 | 5y-DMFS (%) | GP: 93  PP: 72  HR = 4.6 (1.8–12.0), *p* = 0.001 |  | Retrospective study  Over the entire follow-up period*:*  - DMFS*:* HR 1.8 (95% CI 0.9–3.5; *p* = 0.07)  - BCSS*:* HR 2.0 (95% CI 1.0–4.0; *p* = 0.04). |
| 5y-BCSS (%) | GP: 99  PP: 80  HR = 19.1 (2.5–148), *p* = 0.005 | HR = 14.4 (1.7–122), *p* = 0.01 |
| Prat *et al.,* 2012  [39] | 1380 | **ER+**  N0 = 610 (47%)  HER2+ (PAM50 subtype) = 100 (7%)  PP and GP = NR | Tam only | 102 | DRFS (%) | GP: 91  PP 79 | NR | Retrospective study |
| N0 GP*:* 91  N+ GP*:* 76 |
| ***N0***:  Continuous HR = 1.42, *p*< 0.005  Categorical HR = 2.6, *p* = 0.0054 |
| ***N+***:  Continuous HR = 1.26, *p* = 0.06  Categorical HR = 2.12, *p* = 0.03 |
| Kok*et al.,* 2012  [64] | 121 | **ER+**  N+ = 86.9%  PP = 38 (31.4%)  GP =83 (68.6%) | Tam only  (70% for at least 2y) | 115.2 | 10y-BCSS (%) | GP: 80.6  PP: 63.4  HR = 2.78 (1.30–5.94), *p* = 0.008 | NS (HR = 1.88 [0.77–4.61], *p* = 0.17) | Retrospective study |
| 151 | **T1-T2, ER+**  N0 = 91.4%  PP =66 (43.7%)  GP =85 (56.3%) | 0 | 133.2 | 10-y BCSS (%) | GP: 90.2  PP: 63.3  HR = 4.52 (2.01–10.2), *p*< 0.001 | HR = 2.56 (0.91–7.17), *p* = 0.074 | Population = Mook[63] + van’t de Vijver [56] |
| Jonsdottir*et al.,* 2014  [43] | 94 | **N0**  ER+ = 77 (81.9%)  HER2+ = 14 (14.9%)  PP = 49 (52.1%)  GP = 45 (47.9%) | ET (n = 13, 14%), CT (n = 10, 11%) | 127 | DMFS (%) | GP: 80  PP: 71  NS (HR = 1.6 [0.7–3.6], *p* = 0.287) | NR |  |
|  |  |  |  |  | OS (%) | GP: 57.3  PP: 44.5  *p*< 0.0001 |  |  |
| Tobin *et al.,* 2014  [42] | 253 | Uppsala cohort  ER+ = 215 (85.0%)  HER2+ = NR  PP = 124 (49.0%)  GP = 129 (51.0%) | CT (n = 24, 9%), ET (n = 79, 31%) or both (n = 4, 2%) or none (n = 141, 26%) | NR | 21y-BCSS | GP: 79%  PP: 65%  HR = 1.96 (1.21–3.17), *p*=0.005 | HR = 1.50 (0.84–2.68) | Cohort study |
| 159 | Stockholm cohort  ER+ = 130 (81.8%)  HER2+ = NR  PP = 83 (52.2%)  GP = 76 (47.8%) | CT (n = 12, 8%), ET (n = 96, 60%) or both (n = 18, 11%) or none (n = 33, 8%) | NR | BCSS | HR = 4.61 (2.12–10.03) | HR = 3.70 (1.36–10.05) | Cohort study |
| Drukker*et al,*  2014  [65](101) | 295 | **pT1-pT2, < 53y**  N0 = 151 (51.2%)  ER+ = 226 (76.6%)  HER2+ = NR  PP = 180 (61.0%)  GP = 115 (39.0%) | CT (n = 90, 31%), ET (n = 20, 7%) or both (n = 20, 7%) | 222 | 25y-DMFS (%) | GP: 60.4  PP: 41.6  *p*< 0.0001 | NR | Update [56]  -The HRs for DMFS and OS were largest in the first 5 y  -NS after 5y for DMFS and after 10y for OS |
| OS (%) | GP: 57.3  PP: 44.5  *p*< 0.0001 |
| Drukker*et al.,* 2014  [66] | 427 | **cT1-3N0M0, < 61y**  ER+ = 342 (80.1%)  HER2+ = 48 (11.2%)  PP = 208 (48.7%)  GP = 219 (51.3%) | According to Dutch guidelines, Mammaprint® and patient'spreference for treatment*:*  CT (n = 77, 18%), ET (n = 57, 13%), Both (n = 125, 29%),  Trastuzumab (n = 29, 7%) | 61.6 | 5y-DRFS (%) | GP: 97 (94.7–99.4)  PP: 91.7 (87.9–95.7)  *p* = 0.03 | NR | Patients from a prospective study (RASTER study)  Combination with clinical algorithms and comparison with clinical guidelines  82 PP among the 85 ER- |
| Drukker*et al.,* 2014  [67] | 1053 | **T1-3, N0-1, M0**  ER+ = 860 (81.7%)  HER2+ = 120 (11.4%)  PP = 492 (47%)  GP = 561 (53%) | CT (n = 760, 72%), ET (n = 475, 45%) as indicated by guidelines used at the time | 107.5 | 10y-LRR risk (%) | PP: 12.6 (9.7–15.8)  GP: 6.1 (4.1–8.5)  *p*< 0.001 | HR = 1.73 (1.02–2.93), *p* = 0.042 | Multiples datasets, redundant population |
| Beumer*et al.,* 2016  [68] | 217 | ILC from 5 datasets  ER+ = 203 (93.6%)  HER2- = 199 (91.7%)  N0 = 144 (66.4%)  PP = 52 (24%)  GP = 165 (76%) | CT (n = 48, 22%), ET (n = 127, 59%) | 85 | 10y-OS | HR = 3.577 (1.842–6.948), *p*< 0.001 | NS (HR = 2.015 [0.944–4.299], *p* = 0.070) | (datasets*:* RATHER, RASTER, Kok, van de Vijver, unpublished) |
| 10y-DMFS | HR = 3.308 (1.789–6.116), *p*< 0.001 | HR = 2.1 (1.0–4.1), *p* = 0.037 |
| 10y-DMFI | HR = 3.556 (1.621–7.799), *p* = 0.002 | HR = 2.4 (1.0–5.6), *p* = 0.049 |
| Saghatchian*et al.,* 2013  [69](124) | 173 | **4-9N+, T1-3**  ER+ = 141 (81.5%)  HER2+ = 27 (15.6%)  PP = 103 (60%)  GP = 70 (40%) | CT (n = 133, 77%), ET (n = 124, 72%) | 94.8 | DMFS (%) | ***- at 5y***  GP: 86.6  PP: 62.9  ***- at 10y***  GP: 66.8  PP: 52.6  HR = 2.211(1.264-3.866), *p* = 0.005 | NS (HR = 1.888 [0.953-3.739], *p* = 0.068) | Significant difference in subgroup analysis luminal A:DMFS (HR = 2.698 [1.267–5.748], *p* = 0.01) |
| BCSS | ***- at 5y***  GP: 97  PP: 76  ***- at 10y***  GP: 87.7  PP: 62.1  HR = 2.243 (1.188-4.233), *p* = 0.013 | NS (HR = 1.971 [0.897- 4.330], *p* = 0.091) |
| **Neoadjuvant** | | | | | | | | |
| Straver*et al.,* 2010  [70] | 167 | **Stage II-III*:* T > 3cm or N+**  N0 = 30 (18.0%)  ER+ = 88 (52.7%)  HER2+ = 41 (24.6%)  PP = 144 (86%)  GP = 23 (14%) | 6 ddAC, 6 doxorubicine-docetaxel or 6 docetaxel-capecitabine  HER2+*:*ddAC and paclitaxel-trastuzumab-carboplatine | 25 | pCR rate | PP: 20%  GP: 0%  *p* = 0.015 | NR | DFS at 3 years*:* GP 100% and PP 82%, *p* = 0.066  ER-/HER2-*:* 0 GP (38 PP, 13 pCR)  ER+/HER2-*:* 3 pCR/88  ER-/HER2+*:* 13 pCR/41 |
| Esserman*et al.,* 2012  [71] | 220 | **T > 3cm**  cN+ = 35%  ER+ = 56%  HER2+ = 30%  PP = 109 (91%)  GP = 11 (9%) | anthracycline-based regimen +/- taxane-based regimen | 46.8 | 3y-RFS | GP: 100%  PP: 75% | No event in the GP group*:* no possible HR | I-SPY 1 TRIAL |
| pCR | GP: 0%  PP: 24% |
| Whithworth et *al.,* 2017  [72] | 405 | **HR+, HER2-**  ER+ = 388 (95.8%)  cN+ = 254 (62.7%)  PP = 310 (76.5%)  GP = 95 (23.5%) | AC-T or TAC (43%), ddAC-T (28%), TC (16%), AC (4%) | NA | - pCR rate  - OR of achieving pCR | GP: 2%, PP 13%, *p*< 0.001  OR = 7.140 (1.694–30.101), *p* = 0.007 | NS (OR = 1.922 (0.420–9.438), *p*= 0.385) |  |

Abbreviations: HR hormone receptor, ER estrogen receptor, PP poor prognostic, GP good prognostic, LR low risk, HgR high risk, N0 node negative, N+ node positive, CT chemotherapy, ET endocrine therapy, Tam Tamoxifen, y years, DFS disease-free survival, RFS recurrence-free survival, OS overall survival, MFS metastasis-free survival, BCSS breast cancer specific survival, DMFS distant metastasis-free survival, DMFI distant metastasis-free interval, LRR loco-regional recurrence, pCR pathological complete response, NR not reported, NS no significant, NA not applicable, MINDACT Microarray in Node-Negative and 1 to 3 Positive Lymph Node Disease May Avoid Chemotherapy, AOL Adjuvant! Online

***Table S4:* Prognostic value of Endopredict®**

| **Reference** | **N** | **Population** | **Systemic treatment** | **Median follow-up**  **(months)** | **Primary Endpoint(s)** | **Results** | | **Comments** |
| --- | --- | --- | --- | --- | --- | --- | --- | --- |
| **univariate** | **multivariate** |
| **Adjuvant** | | | | | | | | |
| Filipits*et al.,* 2011 [73] | 1702 | **ER+, HER2 –**  (ABCSG-6: n = 378, ABCSG-8: n = 1324, postmenopausal)  LR = 832 (48.9%)  HgR = 870 (51.1%) | ET alone  - Tam 5y (ABCSG-6)  - Tam 5 or 2y + anastrozole 3y (ABCSG-8) | - 97.4 (ABCSG-6)  - 72.3 (ABCSG-8) | 10y-DMFS (%) | - ABCSG-6:  LR: 8 (3–13), HgR: 22 (15–29)  *p*< 0.001  - ABCSG-8:  LR: 6 (2–9), HgR: 15 (11–20)  *p*< 0.001  EPclin:  - ABCSG-6*:*  LR: 4 (1–8), HgR: 28 (20–36)  *p*< 0.001  - ABCSG-8:  LR: 4 (2–5), HgR: 22 (15–29)  *p*< 0.001 | - ABCSG-6  HR = 1.19 (1.04–1.36), *p* = 0.010  - ABCSG-8  HR = 1.26 (1.15–1.38), *p*<0.001 | - Patients from prospective trials  - Description training set*:* 964 ER+, HER2- tumors from patients treated with adjuvant Tamoxifen only  - long-term data in Dubsky*et al.*[74]:  . EP, 0-5y: HR (multivariateanalysis) = 1.20 (1.10-1.31), *p*< 0.001  . EP, >5y: HR (multivariateanalysis) = 1.28 (1.10-1.48), *p*< 0.001  . EPclin, 0-5y: HR = 4.82 (3.12-7.44), *p* < 0.001  . EPclin, >5y: HR = 6.25 (2.72-14.36), *p* < 0.001  . EPclin 10y DMFS: LR 98.20% (96.54-99.85), HgR 87.69 (82.86-92.52) |
| Zhao *et al.,*2014  [75] | 912 | ER+ = 692 (75.9%)  N0 = 602 (66%)  HER2+ (IHC + gene expression) = 114 (12.5%)  % LR and HgR: NR | Yes (n = 436)  No (n = 395)  Unknown (n = 81)  No detail about CT or ET | 80.8 | DMFS | p<0.0001  - ***ER+***  *0-5*y: HR = 1.97 (1.66-2.33); *p*< 0.0001  *5-10*y*:* HR = 1.13 (0.83-1.53); *p* = 0.4393  *>10*y*:* HR = 1.02 (0.55-1.91); *p* = 0.9462  - ***ER-***  *0-5*y*:* HR = 1.11 (0.86-1.45); *p* = 0.4199  *5-10*y*:* HR = 1.04 (0.50-2.15); *p* = 0.9198  >*10*y*:* HR = 0.51 (0.25-1.04); *p*= 0.0628 | - ***ER+***  χ² = 31.4; *p* < 0.0001  - ***ER-***  NS (χ² = 0.2; *p* = 0.67) | - Retrospective study  - Comparison of PAM50, intrinsic, 70-gene, 76-gene, Genomic-Grade-Index, 21-gene-Recurrence-Score, EndoPredict, Wound-Response and Hypoxia |
| Martin *et al.,* 2014 [76] | 555 | **ER+, HER2-, N+**  LR = 141 (25%)  HgR = 414 (75%)  EPclin LR = 74 (13%) | CT ( FEC x 6 or FEC x 4 + paclitaxel x 8)  5-y ET (Tam, AI or both) | 104.4 | 10y-DMFS | LR: 93%, HgR: 70%  HR = 4.8 (2.5-9.5); *p*< 0.0001 | HR = 1.126 (1.041-1.219)  *p* = 0.0031 | - Patients from a prospective trial (GEICAM 9906 trial)  - Interaction test chemotherapy arm (FEC *vs* FEC-T) and EP score*:* NS (*p* = 0.71) |
| Fitzal*et al.,* 2015 [77] | 1324 | **ER+, HER2 – postmenopausal**  LR = 641 (48.4%)  HgR = 683 (51.6%) | Tam 5y or 2y + anastrozole 3y | 72.3 | 10y-local recurrence free survival (%) | LR: 98.4, HgR: 96.2  *p* = 0.008  EPclin  LR: 98.3, HgR: 95.3 | *p*< 0.005 | Patients from a prospective trial (ABCSG-8) |
| Buus*et al.,* 2016 [78] | 928 | **ER+ HER2-**  N0 = 680 (73.3%)  LR = 386 (41.6%)  HgR = 542 (58.4%)  EPclin LR = 546 (58.8%) | anastrozole or Tam 5y  No CT | 120 | DMFS | EPclin  *0-10y:*χ² = 139.3; *p* < 0.001  *0-5y:*χ² = 80.0; *p* < 0.001  *5-10y*: χ² = 59.3; *p* < 0.001  EP  *0-10y:*χ² 49.3; *p*< 0.001  *0-5y*:χ² 25.7; *p* < 0.001  *5-10y*: χ² 23.6; *p* < 0.001 | EP clin  *0-10y*: χ² = 20.3; *p* < 0.001  *0-5y*: χ² = 10.5; *p*= 0.001  *5-10:*χ² = 9.9; *p*= 0.002  EP  *0-10y*: χ² 16.4; *p* < 0.001  *0-5y*: χ² 6.9; *p* = 0.009  *5-10y*: χ² 9.8; *p* = 0.002 | - Patients from a prospective trial (ATAC trial)  - Comparison RS |
| **Neoadjuvant** | | | | | | | | |
| Bertucci *et al.,* 2014  [79] | 553 | **ER+, HER2-**  cN+ = 336 (65%)  LR = 283 (51%)  HgR = 270 (49%) | anthracycline-based CT | 40 | pCR rate (%) | LR: 7, HgR: 17  *p* < 0.001 | OR = 1.13 (1.04–1.24)  *p* = 0.02 | HgR 5y-DFS equal to 73% (95% CI 63–85) *vs* LR 88% (95% CI 81–95)  *p* = 0.015 |

Abbreviations: EP EndoPredict score, EPClin EP based on tumor size and nodal status, ER estrogen receptor, LR low risk, HgR high risk, N0 node negative, N+ node positive, CT chemotherapy, ET endocrine therapy, Tam Tamoxifen, FEC fluorouracil + epirubicine + cyclophosphamide, DMFS distant metastasis-free survival, DFS disease-free survival, pCR pathological complete response, NR not reported, NS no significant, ABCSGAustrian Breast and Colorectal Cancer Study Group, ATACArimidex Tamoxifen Alone or in Combination.

***Table S5:* Prognostic value of PAM50 ROR**

| **Reference** | **N** | **Population** | **Systemic**  **treatment** | **Median follow-up (months)** | **Primary endpoint(s)** | **Results** | | **Comments** |
| --- | --- | --- | --- | --- | --- | --- | --- | --- |
| **Univariate analysis** | **Multivariate analysis** |
| **Adjuvant, retrospective studies in prospective trials** | | | | | | | | |
| Chia *et al.*, 2012  [80] | 398 | premenopausal  Stage I-III  HR+ = 73%  N0 = 25%  continuous ROR-T | - CT (45% non-anthracycline and 55% anthracycline-based)  - Tam 5y versus placebo | 116.4 | DFS  OS (NR) | ROR-T scores of Tam-treated patients have a linear relationship with probability of 10-year relapse in N+ and N0 | NR | Patients from a prospective trial (MA.12 trial) |
| Dowsett*et al.,* 2013 [81] | 1017 | **ER+**  postmenopausal  N0 = 739 (72.7%)  N0 LR = 428 (58%)  N0 IR = 192 (26%)  N0 HgR = 119 (16%) | - 5y anastrozole or Tam or both  - no CT | 120 | DR | continuously increasing relationship between the ROR score and predicted 10-year risk of DR | LRΔχ² 34.3  *p*< 0.001 | -Patients from a prospective trial (ATAC trial)  - Change according to time in Sestak *et al.*[82]*:* in multivariate analysis  - 0 to 5y  χ² 11.41 *(p*< 0001)  - 5 to 10y  χ² 16.29 (*p*< 0.001) |
| Gnant*et al.,* 2014 [83] | 1478 | **ER+,** postmenopausal  (ABCSG-8)  (70% T1, 71% N0)  LR = 502 (34.0%)  IR = 478 (32.3%)  HgR = 498 (33.7%) | Tam 5y or Tam 2y followed by anastrozole 3y  - no CT | 132 | 10y-DRFS (%, 95%CI) | LR*:* 96.7 (94.6–98.0)  IR*:* 91.3 (88.1–93.8)  HgR*:* 79.9 (75.7–83.4) | HR = 1.03 (1.02–1.04), *p* < 0.0001  ΔLRχ2 = 53.49, *p*< 0.0001 | - Patients from a prospective trial  - Continuous ROR-S  - Long-term data in Filipits*et al.*[84]*:* After 5y (multivariate analysis)  - IR *vs* LR*:* HR = 3.04 (1.29–7.19), *p* = 0.01  - HgR*vs* LR*:* HR = 4.53 (1.92–10.71), *p* < 0.001 |
| Sestak *etal.,* 2015  [85] | 2137 | **Postmenopausal , HR+**  N0 = 1,580 (73.9%)  N0+HER2- = 1,455 (68.1%)  LR =1,183 (55.3%)  IR =538 (25.2%)  HgR =416 (19.5%) | anastrozole or Tam 5y or Tam for 2y + anastrozole for 3y | 120 | First DR from 5y after diagnosis (%, 95%CI) | LR*:* 2.4 (1.6-3.5), IR*:* 8.3 (6.1-11.2), HgR*:* 16.6 (13.1-20.9)  HR = 1.96 (1.73-2.21), *p*< .001 | HR =1.80 (1.57-2.06), *p*< 0.001 | - Patients from prospective trials (ATAC+ABCSG 8)  - < 10%: LR group, ROR 0 to 26; 10% to 20%: IR group, ROR 26 to 68; > 20%: HgR group, ROR > 68  - population already studied [81,83], complementary information about the risk of late recurrence |

| Gnant*et al.,* 2015 [86] | 543 | Subgroup analysis of patients from ABCSG-8 and ATAC trials  **Postmenopausal, HR+**  **1-3 N+**  HER2 + = 28 (5%)  %LR, IR, HgR: NR | anastrozole or Tam 5y or Tam 2y + anastrozole 3y | 9.6y | 10y DRFS (%, 95%CI) | **1 N+**  LR: 93.4 (87.2-96.7), IR: 84.5 (75-90.5), HgR: 74.5 (63.9-82.5)  IR *vs* LR*:* HR = 2.11 (0.92–4.846), *p* = 0.078  HgR*vs* LR*:* HR = 3.56 (1.62–7.80), *p* = 0.0016  **2-3 N+**  LR+IR: 87.5 (77.2-93.4), HgR: 66.3 (56.2-74.5)  HgR*vs* LR +IR*:* HR = 3.023 (1.462–6.249) *p* = 0.0028 | **1 N+**  ΔLRχ2 = 11.32  *p* = 0.0035  **2-3 N+**  ΔLRχ2 = 10.93  p = 0.0001 | N+ subgroup analysis of a population already evaluated [81,83] |
| --- | --- | --- | --- | --- | --- | --- | --- | --- |
| Martin *et al.,* 2016 [87] | 555 | **N+, ER+, HER2-**  (GEICAM 9906 trial)  ROR-S:  LR =173 (32.3%)  IR =233 (43.5%)  HgR = 130 (25.2%) | CT (6 FEC or FEC X 4 + 8 weekly paclitaxel)  5-y ET (Tam, AI or both) | 104.4 | DMFS | **- ROR-S*:***LR *vs* IR*:* HR = 2.3, LR *vs*HgR*:* HR = 3.2  **- ROR-P*:***LR *vs* IR*:* HR = 2.5, LR *vs*HgR*:* HR = 4  **- ROR-T*:***LR *vs* IR*:* HR = 2.3, LR *vs*HgR*:* HR = 3.7  **- ROR-PT*:*** LR *vs* IR*:* HR = 4.5, LR *vs*HgR*:* HR = 5.8  **-***p*< 0.001 for all |  | Cutoffs*:* ROR-S (<24; 24–53; >53), ROR-P (<12; 12–53; >53), ROR-T (<29; 29–65; >65), PAM50 ROR-PT (<18; 18–65; >65). |
| Liu *et al.,* 2015  [88] | 1094 | **≤60**y**, N+ or high-risk N0**  ER+ = 638 (58.3%)  N0 = 325 (29.7%)  HER2+ = 132 (12.1%)  LR = 37 (3.4%)  IR = 196 (17.9%)  HgR = 861 (78.7%) | - AC 4 cycles + paclitaxel 4 cycles or dose-intense CEF6 cycles or ddEC 6 cycles + paclitaxel 4 cycles  - ET (n = 635, 58%) | 96 | RFS | categorical ROR*:* NS  (HR of HgR*vs* LR+IR = 1.27 [0.83–1.95], *p* = 0.28) | Higher continuous ROR was associated with worse RFS (*p* = 0.03) | Patients from a prospective trial |
| **Adjuvant, retrospective studies** | | | | | | | | |
| Parker *et al.,* 2009 [89] | 761 | N+ = 35 (4.6%)  ER+ = 544 (71.5%)  HER2+ = 66  % LR, IR, HgR: NR | 0 | Median RFS 108 | RFS | *p*< 0.0001 | *p*< 0.0001 | Creation signature from 189 samples of N0 with adjuvant therapy |
| 133 | N+ = 93 (70%)  ER+ = 82 (62%)  HER2+ = 33 (25%)  % LR, IR, HgR: NR | neoadjuvant CT (T/FAC) | NA | pCR | Se 94%, Sp 57%, VPN 97%, VPP 43% | *p* = 0.175 |  |

| Nielsen *et al.,* 2010 [90] | 770 | **ER+**  N0 = 222 (28.2%)  HER2+ = 75 (9.6%)  LR = 217 (28.2%)  IR = 468 (60.8%)  HgR = 85 (11.0%) | - Tam 5y  - no CT | 140.4 | BCSS | *p* = 3e-8 | - 0-5y*:p*< 0.0001  *IR vs LR:* HR 2.04 (0.89–4.66)  *HgR vs LR:* HR 6.48 (2.56–16.40)  - 5y and after*: p* =0.0388  *IR vs LR:* HR 1.86 (1.15–3.00)  *HgR VS LR:* HR 1.57 (0.71–3.46) |  |
| --- | --- | --- | --- | --- | --- | --- | --- | --- |
| RFS | *p* = 1.24e-7 | - 0-5y*:p*< 0.0001  *IR vs LR:* HR 2.00 (1.17-3.44)  *HgR vs LR:* HR 4.54 (2.34-8.79)  - after 5y*:p* = 0.2495  *IR vs LR:* 1.46 (0.90-2.38)  *HgR vs LR:* HR 1.01 (0.41-2.45) |
| Prat *et al.,* 2012  [39] | 1380 | **ER+**  N0 = 610 (47%)  HER2+ (PAM50 subtype) = 100 (7%)  % LR, IR, HgR: NR | Tam only | 102 | 8.5y-DRFS | **ROR-S**  N0 LR 90%, N+ LR 74%  - N0  Continuous: HR = 1.93, *p*< 0.0001  Categorical (HgR*vs* LR): HR = 4.13, *p*< 0.0001  - N+  Continuous: HR = 1.39, *p* = 0.02  Categorical: HR = 1.64, *p* = 0.21 | NR | (786 from Nielsen *et al*[90] +datasets MDACC298 LOI327 ZHANG136 PAWI159) |
| **ROR-P**  N0 LR 94%, N+ LR 80%  - N0  Continuous: HR = 1.95, *p*< 0.0001  Categorical: HR = 7.83, *p* = 0.0002  - N+  Continuous: HR = 1.36, *p* = 0.03  Categorica:l HR = 3.01, *p* = 0.02 |
| Zhao *et al.,* 2014 [75] | 912 | 6 datasets  ER+ = 687 (75.3%)  N0  = 602 (66.0%)  HER2+ (IHC + gene expression) = 114 (12.5%)  %LR, IR, HgR: NR | N = 436 (48%)  No detail about the type of adjuvant treatment | 80.8 | DMFS | **ER+**  χ² = 53.2, *p*< 0.0001  - 0-5y*:* HR = 2.16 (1.78-2.61), *p*< 0.0001  - 5-10y*:* HR = 1.26 (0.93-1.70), *p* = 0.1383  - 10-15y*:* HR = 0.91 (0.48-1.73), *p* = 0.7773 | **ER+**  χ² = 31.9, *p*< 0.0001 | Datasets : TRANSBIG, Loi, Miller, Pawitan, Desmedt, Minn |
| **ER-**  χ² = 0.2, *p* = 0.6827  - 0-5y*:* HR = 1.11 (0.86-1.44), *p* = 0.4312  - 5-10y*:* HR = 1.6 (0.64-4.03), *p* = 0.3161  - 10-15y*:* HR = 0.54 (0.27-1.09), *p* = 0.0835 | **ER-**  χ² = 0.4, *p* = 0.5434 |
| 996 | METABRIC set  ER+ = 801 (80.4%)  %LR, IR, HgR: NR | N = 743 (75%) | NR | DSS | **ER+**  - 0-5y*:* HR = 2.20 (1.78-2.72), *p*< 0·0001  - 5-10y*:* HR = 1.32 (1.07-1.64), *p* = 0.0107  - 10-15y*:* HR = 1.04 (0.75-1.43), *p* = 0.8285 | NR |  |
| **ER-**  - 0-5y*:* HR = 1.03 (0.82-1.30), *p* = 0.7855  - 5-10y*:* HR = 0.68 (0.45-1.03), *p* = 0.0658  - 10-15y*:* HR = 0.27 (0.09-0.81), *p* = 0.0187 |
| Cockburn *et al.,* 2016 [91] |  | **ER+, HER2-**  (GSE6532-A and GSE6532-2)  %LR, IR, HgR: NR | - Tam 5y  - No detail about CT | 120 | DMFS | N0*:* HR = 0.48, *p* = 8.07E-04  N+*:* HR = 0.65, *p* = 1.34E-02 | NR | Cohort study |
| **Neoadjuvant** | | | | | | | | |
| Dunbier*et al.,* 2011 [92] | 103 | **ER+**  **postmenauposal**  LR = 18 (17.5%)  IR = 43 (41.7%)  HgR = 42 (40.8%) | anastrozole 16 weeks | NA | secondary end point*:* objective tumor response (UICC/WHO assessment criteria) | HgR 33%, IR 49%, LR 67%  *p* = 0.04 | NR | Primary endpoint*:* biologic change in proliferation as measured by Ki67 |
| Esserman*et al.,* 2012 [71] | 215 | **T > 3cm**  ER+ = 124 (56%)  cN+ = 143 (65%)  HER2+ = 67 (30%)  LR = 32 (27%)  IR = 42 (35%)  HgR = 46 (38%) | anthracycline-based regimen +/- taxane-based regimen | 46.8 | 3y-RFS (%) | - LR: 97, IR: 81, HgR: 61  - LR *vs*IR+HgR*:* HR = 0.22 (0.07–0.72),*p* < 0.05 | LR *vs*IR+HgR*:*  HR = 0.29 (0.09–0.96), *p*< 0.05 | I-SPY 1 TRIAL |
| pCR (%) | LR: 6, IR: 17, HgR: 36, *p*= 0.006 | NS |
| Prat *et al.,* 2016  [93] | 180 | **HR+ (ER+ 99.4%), HER2-**  N0 = 67 (37.2%)  continuous ROR-S | 8 to 10 cycles of anthracyclines and taxanes | NA | Residual breast cancer burden 0/I*:* response rate | continuous ROR score was a significant predictor of response to CT (*p* = 0.047) | NR | every 20 point increase in ROR score, a patient was 59.1% more likely to respond to CT in the neoadjuvant setting |

Abbreviations: ROR risk of recurrence, ROR-S ROR based on subtype, ROR-P ROR based on subtype and proliferation, ROR-T ROR based on subtype and tumor size, ROR-PT ROR based on subtype, proliferation, and tumor size, HR hormone receptor, ER estrogen receptor, LR low risk, IR intermediate risk, HgR high risk, N0 node negative, N+ node positive, CT chemotherapy, ET endocrine therapy, Tam Tamoxifen, DFS disease-free survival, RFS recurrence-free survival, DRFS distance recurrence-free survival, OS overall survival, MFS metastasis-free survival, BCSS breast cancer specific survival, DMFS distant metastasis-free survival, DMFI distant metastasis-free interval, TTDR time to distant recurrence, LRR loco-regional recurrence, pCR pathological complete response, NR not reported, NS no significant

***Table S6*: Evaluable multivariate analysis of biomarkers for prognosis in adjuvant studies**

1. **uPA/PAI-1**

| Number of unique patients | |
| --- | --- |
| Total | 10812 |
| Number of multivariate models | 7 |
| Biomarker is significant (*p*< 0.05) | 4 |
| Adjustment factor (% of studies) |  |
| - Tumor size | 100% |
| - Tumor grade | 86% |
| - Age | 71% |
| - ER status | 57% |
| - HER2 status | 43% |
| - HR status | 43% |
| - Nodal status / number of nodes | 43% |
| - Menopausal status | 43% |
| - PR status | 29% |
| - Type of surgery | 14% |
| - Systemic treatment | 14% |
| - Histology subtype | 14% |
| - LVI | 14% |

1. **Oncotype DX®**

| Number of unique patients | |
| --- | --- |
| Total | 11136 |
| Number of multivariate models | 13 |
| Biomarker is significant (*p*< 0.05) | 9 |
| Adjustment factors (%) |  |
| - Tumor grade | 77% |
| - Tumor size | 77% |
| - Age | 62% |
| - Nodal status / number of nodes | 38% |
| - HER2 status | 23% |
| - ER level | 31% |
| - PR level | 31% |
| - Ki-67 | 23% |
| - Systemic treatment | 15% |
| - Type of surgery | 15% |
| - Type of endocrine treatment | 15% |
| - Others* | 8% |

* subtype, LVI, clinical recommendations according to St Gallen

1. **MammaPrint®**

| Number of unique patients | |
| --- | --- |
| Total | 1973 |
| Number of multivariate models | 9 |
| Biomarker is significant (*p*< 0.05) | 7 |
| Adjustment factor (%) |  |
| - Tumor grade | 63% |
| - Tumor size | 63% |
| - Nodal status / number of nodes | 63% |
| - ER status/ level | 50% |
| - Age | 50% |
| - HER2 status | 38% |
| - Adjuvant! online | 38% |
| - Clinical risk evaluation according to recommendations | 25% |
| - PR status / level | 25% |
| - Others** | 13% |

** Ki-67, Histological subtype, Type of surgery, Endocrine therapy, Chemotherapy

Abbreviations: ER estrogen receptor, PR progesterone receptor, HR hormone receptor, LVI lympho-vascular invasion, IHC immunohistochemical

1. **EndoPredict®**

| Number of unique patients | |
| --- | --- |
| Total | 5421 |
| Number of multivariate models | 5 |
| Biomarker is significant (*p*< 0.05) | 5 |
| Adjustment factor (%) |  |
| - Tumor size | 100% |
| - Nodal status / number of nodes | 100% |
| - Tumor grade | 100% |
| - Age | 80% |
| - ER status | 40% |
| - PR status | 40% |
| - Ki-67 | 40% |
| - Type of endocrine therapy | 60% |
| - Systemic treatment | 20% |
| - Other genomic signature | 20% |

1. **PAM50 ROR**

| Number of unique patients | |
| --- | --- |
| Total | 6032 |
| Number of multivariate models | 6 |
| Biomarker is significant (*p*< 0.05) | 6 |
| Adjustment factor (%) |  |
| - Tumor size | 83% |
| - Nodal status / number of nodes | 83% |
| - Tumor grade | 83% |
| - Age | 67% |
| - Endocrine therapy | 33% |
| - HER2 status | 17% |
| - ER status | 17% |
| - Systemic treatment | 17% |
| - Type of chemotherapy | 17% |
| - Other genomic signatures | 17% |
| - Radiotherapy | 17% |
| - Intrinsic subtype | 17% |

References for supplementary data

[1] Teutsch SM, Bradley LA, Palomaki GE, Haddow JE, Piper M, Calonge N, et al. The Evaluation of Genomic Applications in Practice and Prevention (EGAPP) Initiative: methods of the EGAPP Working Group. Genet Med Off J Am Coll Med Genet 2009;11:3–14. doi:10.1097/GIM.0b013e318184137c.

[2] Luporsi E, Bellocq J-P, Barrière J, Bonastre J, Chetritt J, Le Corroller A-G, et al. [uPA/PAI-1, Oncotype DXTM, MammaPrint(®). Prognosis and predictive values for clinical utility in breast cancer management]. Bull Cancer (Paris) 2015;102:719–29. doi:10.1016/j.bulcan.2015.05.003.

[3] Harris LN, Ismaila N, McShane LM, Andre F, Collyar DE, Gonzalez-Angulo AM, et al. Use of Biomarkers to Guide Decisions on Adjuvant Systemic Therapy for Women With Early-Stage Invasive Breast Cancer: American Society of Clinical Oncology Clinical Practice Guideline. J Clin Oncol Off J Am Soc Clin Oncol 2016;34:1134–50. doi:10.1200/JCO.2015.65.2289.

[4] Hayes DF, Bast RC, Desch CE, Fritsche H, Kemeny NE, Jessup JM, et al. Tumor marker utility grading system: a framework to evaluate clinical utility of tumor markers. J Natl Cancer Inst 1996;88:1456–66.

[5] Simon RM, Paik S, Hayes DF. Use of archived specimens in evaluation of prognostic and predictive biomarkers. J Natl Cancer Inst 2009;101:1446–52. doi:10.1093/jnci/djp335.

[6] Jänicke F, Prechtl A, Thomssen C, Harbeck N, Meisner C, Untch M, et al. Randomized adjuvant chemotherapy trial in high-risk, lymph node-negative breast cancer patients identified by urokinase-type plasminogen activator and plasminogen activator inhibitor type 1. J Natl Cancer Inst 2001;93:913–20.

[7] Harbeck N, Schmitt M, Meisner C, Friedel C, Untch M, Schmidt M, et al. Ten-year analysis of the prospective multicentre Chemo-N0 trial validates American Society of Clinical Oncology (ASCO)-recommended biomarkers uPA and PAI-1 for therapy decision making in node-negative breast cancer patients. Eur J Cancer 2013;49:1825–35. doi:10.1016/j.ejca.2013.01.007.

[8] Look MP, van Putten WLJ, Duffy MJ, Harbeck N, Christensen IJ, Thomssen C, et al. Pooled analysis of prognostic impact of urokinase-type plasminogen activator and its inhibitor PAI-1 in 8377 breast cancer patients. J Natl Cancer Inst 2002;94:116–28.

[9] Look M, van Putten W, Duffy M, Harbeck N, Christensen IJ, Thomssen C, et al. Pooled analysis of prognostic impact of uPA and PAI-1 in breast cancer patients. Thromb Haemost 2003;90:538–48. doi:10.1160/TH-02-11-0264.

[10] Jänicke F, Schmitt M, Pache L, Ulm K, Harbeck N, Höfler H, et al. Urokinase (uPA) and its inhibitor PAI-1 are strong and independent prognostic factors in node-negative breast cancer. Breast Cancer Res Treat 1993;24:195–208.

[11] Kim SJ, Shiba E, Kobayashi T, Yayoi E, Furukawa J, Takatsuka Y, et al. Prognostic impact of urokinase-type plasminogen activator (PA), PA inhibitor type-1, and tissue-type PA antigen levels in node-negative breast cancer: a prospective study on multicenter basis. Clin Cancer Res Off J Am Assoc Cancer Res 1998;4:177–82.

[12] Harbeck N, Dettmar P, Thomssen C, Berger U, Ulm K, Kates R, et al. Risk-group discrimination in node-negative breast cancer using invasion and proliferation markers: 6-year median follow-up. Br J Cancer 1999;80:419–26. doi:10.1038/sj.bjc.6690373.

[13] Harbeck N, Thomssen C, Berger U, Ulm K, Kates RE, Höfler H, et al. Invasion marker PAI-1 remains a strong prognostic factor after long-term follow-up both for primary breast cancer and following first relapse. Breast Cancer Res Treat 1999;54:147–57.

[14] Konecny G, Untch M, Arboleda J, Wilson C, Kahlert S, Boettcher B, et al. Her-2/neu and urokinase-type plasminogen activator and its inhibitor in breast cancer. Clin Cancer Res Off J Am Assoc Cancer Res 2001;7:2448–57.

[15] Harbeck N, Kates RE, Schmitt M. Clinical relevance of invasion factors urokinase-type plasminogen activator and plasminogen activator inhibitor type 1 for individualized therapy decisions in primary breast cancer is greatest when used in combination. J Clin Oncol Off J Am Soc Clin Oncol 2002;20:1000–7. doi:10.1200/JCO.2002.20.4.1000.

[16] Harbeck N, Kates RE, Look MP, Meijer-Van Gelder ME, Klijn JGM, Krüger A, et al. Enhanced benefit from adjuvant chemotherapy in breast cancer patients classified high-risk according to urokinase-type plasminogen activator (uPA) and plasminogen activator inhibitor type 1 (n = 3424). Cancer Res 2002;62:4617–22.

[17] Zemzoum I, Kates RE, Ross JS, Dettmar P, Dutta M, Henrichs C, et al. Invasion factors uPA/PAI-1 and HER2 status provide independent and complementary information on patient outcome in node-negative breast cancer. J Clin Oncol Off J Am Soc Clin Oncol 2003;21:1022–8. doi:10.1200/JCO.2003.04.170.

[18] Descotes F, Riche B, Saez S, De Laroche G, Datchary J, Roy P, et al. Plasminogen activator inhibitor type 1 is the most significant of the usual tissue prognostic factors in node-negative breast ductal adenocarcinoma independent of urokinase-type plasminogen activator. Clin Breast Cancer 2008;8:168–77. doi:10.3816/CBC.2008.n.018.

[19] De Cremoux P, Grandin L, Diéras V, Savignoni A, Degeorges A, Salmon R, et al. Urokinase-type plasminogen activator and plasminogen-activator-inhibitor type 1 predict metastases in good prognosis breast cancer patients. Anticancer Res 2009;29:1475–82.

[20] Borstnar S, Sadikov A, Mozina B, Cufer T. High levels of uPA and PAI-1 predict a good response to anthracyclines. Breast Cancer Res Treat 2010;121:615–24. doi:10.1007/s10549-009-0691-8.

[21] Kolben T, Augustin D, Armbrust R, Kolben TM, Degenhardt T, Burgmann M, et al. Impact of guideline-based use of uPA/PAI-1 on patient outcome in intermediate-risk early breast cancer. Breast Cancer Res Treat 2016;155:109–15. doi:10.1007/s10549-015-3653-3.

[22] Dovnik NF, Takac I. Prognostic significance of uPA/PAI-1 level, HER2 status, and traditional histologic factors for survival in node-negative breast cancer patients. Radiol Oncol 2017;51:65–73. doi:10.1515/raon-2016-0024.

[23] Viala M, Alexandre M, Thezenas S, Lamy P-J, Maran-Gonzalez A, Gutowski M, et al. Prognostic impact of the inclusion of uPA/PAI-1 for adjuvant treatment decision-making in ER+/Her2- pN0 early breast cancers. Breast Cancer Res Treat 2017. doi:10.1007/s10549-017-4373-7.

[24] Sparano JA, Gray RJ, Makower DF, Pritchard KI, Albain KS, Hayes DF, et al. Prospective Validation of a 21-Gene Expression Assay in Breast Cancer. N Engl J Med 2015;373:2005–14. doi:10.1056/NEJMoa1510764.

[25] Sparano JA, Gray RJ, Makower DF, Pritchard KI, Albain KS, Hayes DF, et al. Adjuvant Chemotherapy Guided by a 21-Gene Expression Assay in Breast Cancer. N Engl J Med 2018;379:111–21. doi:10.1056/NEJMoa1804710.

[26] Gluz O, Nitz UA, Christgen M, Kates RE, Shak S, Clemens M, et al. West German Study Group Phase III PlanB Trial: First Prospective Outcome Data for the 21-Gene Recurrence Score Assay and Concordance of Prognostic Markers by Central and Local Pathology Assessment. J Clin Oncol Off J Am Soc Clin Oncol 2016;34:2341–9. doi:10.1200/JCO.2015.63.5383.

[27] Paik S, Shak S, Tang G, Kim C, Baker J, Cronin M, et al. A multigene assay to predict recurrence of tamoxifen-treated, node-negative breast cancer. N Engl J Med 2004;351:2817–26. doi:10.1056/NEJMoa041588.

[28] Esteva FJ, Sahin AA, Cristofanilli M, Coombes K, Lee S-J, Baker J, et al. Prognostic role of a multigene reverse transcriptase-PCR assay in patients with node-negative breast cancer not receiving adjuvant systemic therapy. Clin Cancer Res Off J Am Assoc Cancer Res 2005;11:3315–9. doi:10.1158/1078-0432.CCR-04-1707.

[29] Paik S, Tang G, Shak S, Kim C, Baker J, Kim W, et al. Gene expression and benefit of chemotherapy in women with node-negative, estrogen receptor-positive breast cancer. J Clin Oncol Off J Am Soc Clin Oncol 2006;24:3726–34. doi:10.1200/JCO.2005.04.7985.

[30] Habel LA, Shak S, Jacobs MK, Capra A, Alexander C, Pho M, et al. A population-based study of tumor gene expression and risk of breast cancer death among lymph node-negative patients. Breast Cancer Res BCR 2006;8:R25. doi:10.1186/bcr1412.

[31] Goldstein LJ, Gray R, Badve S, Childs BH, Yoshizawa C, Rowley S, et al. Prognostic utility of the 21-gene assay in hormone receptor-positive operable breast cancer compared with classical clinicopathologic features. J Clin Oncol Off J Am Soc Clin Oncol 2008;26:4063–71. doi:10.1200/JCO.2007.14.4501.

[32] Espinosa E, Sánchez-Navarro I, Gámez-Pozo A, Marin AP, Hardisson D, Madero R, et al. Comparison of prognostic gene profiles using qRT-PCR in paraffin samples: a retrospective study in patients with early breast cancer. PloS One 2009;4:e5911. doi:10.1371/journal.pone.0005911.

[33] Yorozuya K, Takeuchi T, Yoshida M, Mouri Y, Kousaka J, Fujii K, et al. Evaluation of Oncotype DX Recurrence Score as a prognostic factor in Japanese women with estrogen receptor-positive, node-negative primary Stage I or IIA breast cancer. J Cancer Res Clin Oncol 2010;136:939–44. doi:10.1007/s00432-009-0736-8.

[34] Albain KS, Barlow WE, Shak S, Hortobagyi GN, Livingston RB, Yeh I-T, et al. Prognostic and predictive value of the 21-gene recurrence score assay in postmenopausal women with node-positive, oestrogen-receptor-positive breast cancer on chemotherapy: a retrospective analysis of a randomised trial. Lancet Oncol 2010;11:55–65. doi:10.1016/S1470-2045(09)70314-6.

[35] Mamounas EP, Tang G, Fisher B, Paik S, Shak S, Costantino JP, et al. Association between the 21-gene recurrence score assay and risk of locoregional recurrence in node-negative, estrogen receptor-positive breast cancer: results from NSABP B-14 and NSABP B-20. J Clin Oncol Off J Am Soc Clin Oncol 2010;28:1677–83. doi:10.1200/JCO.2009.23.7610.

[36] Dowsett M, Cuzick J, Wale C, Forbes J, Mallon EA, Salter J, et al. Prediction of risk of distant recurrence using the 21-gene recurrence score in node-negative and node-positive postmenopausal patients with breast cancer treated with anastrozole or tamoxifen: a TransATAC study. J Clin Oncol Off J Am Soc Clin Oncol 2010;28:1829–34. doi:10.1200/JCO.2009.24.4798.

[37] Toi M, Iwata H, Yamanaka T, Masuda N, Ohno S, Nakamura S, et al. Clinical significance of the 21-gene signature (Oncotype DX) in hormone receptor-positive early stage primary breast cancer in the Japanese population. Cancer 2010;116:3112–8. doi:10.1002/cncr.25206.

[38] Sun B, Zhang F, Wu S-K, Guo X, Zhang L-L, Jiang Z-F, et al. Gene expression profiling for breast cancer prognosis in Chinese populations. Breast J 2011;17:172–9. doi:10.1111/j.1524-4741.2010.01049.x.

[39] Prat A, Parker JS, Fan C, Cheang MCU, Miller LD, Bergh J, et al. Concordance among gene expression-based predictors for ER-positive breast cancer treated with adjuvant tamoxifen. Ann Oncol Off J Eur Soc Med Oncol 2012;23:2866–73. doi:10.1093/annonc/mds080.

[40] Solin LJ, Gray R, Goldstein LJ, Recht A, Baehner FL, Shak S, et al. Prognostic value of biologic subtype and the 21-gene recurrence score relative to local recurrence after breast conservation treatment with radiation for early stage breast carcinoma: results from the Eastern Cooperative Oncology Group E2197 study. Breast Cancer Res Treat 2012;134:683–92. doi:10.1007/s10549-012-2072-y.

[41] Naoi Y, Kishi K, Tsunashima R, Shimazu K, Shimomura A, Maruyama N, et al. Comparison of efficacy of 95-gene and 21-gene classifier (Oncotype DX) for prediction of recurrence in ER-positive and node-negative breast cancer patients. Breast Cancer Res Treat 2013;140:299–306. doi:10.1007/s10549-013-2640-9.

[42] Tobin NP, Lindström LS, Carlson JW, Bjöhle J, Bergh J, Wennmalm K. Multi-level gene expression signatures, but not binary, outperform Ki67 for the long term prognostication of breast cancer patients. Mol Oncol 2014;8:741–52. doi:10.1016/j.molonc.2014.02.007.

[43] Jonsdottir K, Assmus J, Slewa A, Gudlaugsson E, Skaland I, Baak JPA, et al. Prognostic value of gene signatures and proliferation in lymph-node-negative breast cancer. PloS One 2014;9:e90642. doi:10.1371/journal.pone.0090642.

[44] Jegadeesh NK, Kim S, Prabhu RS, Oprea GM, Yu DS, Godette KG, et al. The 21-gene recurrence score and locoregional recurrence in breast cancer patients. Ann Surg Oncol 2015;22:1088–94. doi:10.1245/s10434-014-4252-y.

[45] Le Du F, Gonzalez-Angulo AM, Park M, Liu DD, Hortobagyi GN, Ueno NT. Effect of 21-Gene RT-PCR Assay on Adjuvant Therapy and Outcomes in Patients With Stage I Breast Cancer. Clin Breast Cancer 2015;15:458–66. doi:10.1016/j.clbc.2015.06.006.

[46] Wen HY, Krystel-Whittemore M, Patil S, Pareja F, Bowser ZL, Dickler MN, et al. Breast carcinoma with an Oncotype Dx recurrence score <18: Rate of distant metastases in a large series with clinical follow-up. Cancer 2017;123:131–7. doi:10.1002/cncr.30271.

[47] Mamounas EP, Liu Q, Paik S, Baehner FL, Tang G, Jeong J-H, et al. 21-Gene Recurrence Score and Locoregional Recurrence in Node-Positive/ER-Positive Breast Cancer Treated With Chemo-Endocrine Therapy. J Natl Cancer Inst 2017;109. doi:10.1093/jnci/djw259.

[48] Barcenas CH, Raghavendra A, Sinha AK, Syed MP, Hsu L, Patangan MG, et al. Outcomes in patients with early-stage breast cancer who underwent a 21-gene expression assay. Cancer 2017. doi:10.1002/cncr.30618.

[49] Gianni L, Zambetti M, Clark K, Baker J, Cronin M, Wu J, et al. Gene expression profiles in paraffin-embedded core biopsy tissue predict response to chemotherapy in women with locally advanced breast cancer. J Clin Oncol Off J Am Soc Clin Oncol 2005;23:7265–77. doi:10.1200/JCO.2005.02.0818.

[50] Chang JC, Makris A, Gutierrez MC, Hilsenbeck SG, Hackett JR, Jeong J, et al. Gene expression patterns in formalin-fixed, paraffin-embedded core biopsies predict docetaxel chemosensitivity in breast cancer patients. Breast Cancer Res Treat 2008;108:233–40. doi:10.1007/s10549-007-9590-z.

[51] Akashi-Tanaka S, Shimizu C, Ando M, Shibata T, Katsumata N, Kouno T, et al. 21-Gene expression profile assay on core needle biopsies predicts responses to neoadjuvant endocrine therapy in breast cancer patients. Breast Edinb Scotl 2009;18:171–4. doi:10.1016/j.breast.2009.03.005.

[52] Ueno T, Masuda N, Yamanaka T, Saji S, Kuroi K, Sato N, et al. Evaluating the 21-gene assay Recurrence Score® as a predictor of clinical response to 24 weeks of neoadjuvant exemestane in estrogen receptor-positive breast cancer. Int J Clin Oncol 2014;19:607–13. doi:10.1007/s10147-013-0614-x.

[53] Yardley DA, Peacock NW, Shastry M, Burris HA, Bechhold RG, Hendricks CB, et al. A phase II trial of ixabepilone and cyclophosphamide as neoadjuvant therapy for patients with HER2-negative breast cancer: correlation of pathologic complete response with the 21-gene recurrence score. Breast Cancer Res Treat 2015;154:299–308. doi:10.1007/s10549-015-3613-y.

[54] Soran A, Bhargava R, Johnson R, Ahrendt G, Bonaventura M, Diego E, et al. The impact of Oncotype DX® recurrence score of paraffin-embedded core biopsy tissues in predicting response to neoadjuvant chemotherapy in women with breast cancer. Breast Dis 2016;36:65–71. doi:10.3233/BD-150199.

[55] Cardoso F, van’t Veer LJ, Bogaerts J, Slaets L, Viale G, Delaloge S, et al. 70-Gene Signature as an Aid to Treatment Decisions in Early-Stage Breast Cancer. N Engl J Med 2016;375:717–29. doi:10.1056/NEJMoa1602253.

[56] van de Vijver MJ, He YD, van’t Veer LJ, Dai H, Hart AAM, Voskuil DW, et al. A gene-expression signature as a predictor of survival in breast cancer. N Engl J Med 2002;347:1999–2009. doi:10.1056/NEJMoa021967.

[57] van ’t Veer LJ, Dai H, van de Vijver MJ, He YD, Hart AAM, Mao M, et al. Gene expression profiling predicts clinical outcome of breast cancer. Nature 2002;415:530–6. doi:10.1038/415530a.

[58] Buyse M, Loi S, van’t Veer L, Viale G, Delorenzi M, Glas AM, et al. Validation and clinical utility of a 70-gene prognostic signature for women with node-negative breast cancer. J Natl Cancer Inst 2006;98:1183–92. doi:10.1093/jnci/djj329.

[59] Nuyten DSA, Kreike B, Hart AAM, Chi J-TA, Sneddon JB, Wessels LFA, et al. Predicting a local recurrence after breast-conserving therapy by gene expression profiling. Breast Cancer Res BCR 2006;8:R62. doi:10.1186/bcr1614.

[60] Thomassen M, Tan Q, Eiriksdottir F, Bak M, Cold S, Kruse TA. Prediction of metastasis from low-malignant breast cancer by gene expression profiling. Int J Cancer 2007;120:1070–5. doi:10.1002/ijc.22449.

[61] Mook S, Schmidt MK, Viale G, Pruneri G, Eekhout I, Floore A, et al. The 70-gene prognosis-signature predicts disease outcome in breast cancer patients with 1-3 positive lymph nodes in an independent validation study. Breast Cancer Res Treat 2009;116:295–302. doi:10.1007/s10549-008-0130-2.

[62] Bueno-de-Mesquita JM, Linn SC, Keijzer R, Wesseling J, Nuyten DSA, Krimpen C van, et al. Validation of 70-gene prognosis signature in node-negative breast cancer. Breast Cancer Res Treat 2009;117:483–95. doi:10.1007/s10549-008-0191-2.

[63] Mook S, Schmidt MK, Weigelt B, Kreike B, Eekhout I, van de Vijver MJ, et al. The 70-gene prognosis signature predicts early metastasis in breast cancer patients between 55 and 70 years of age. Ann Oncol Off J Eur Soc Med Oncol 2010;21:717–22. doi:10.1093/annonc/mdp388.

[64] Kok M, Koornstra RH, Mook S, Hauptmann M, Fles R, Jansen MP, et al. Additional value of the 70-gene signature and levels of ER and PR for the prediction of outcome in tamoxifen-treated ER-positive breast cancer. Breast Edinb Scotl 2012;21:769–78. doi:10.1016/j.breast.2012.04.010.

[65] Drukker CA, van Tinteren H, Schmidt MK, Rutgers EJT, Bernards R, van de Vijver MJ, et al. Long-term impact of the 70-gene signature on breast cancer outcome. Breast Cancer Res Treat 2014;143:587–92. doi:10.1007/s10549-013-2831-4.

[66] Drukker CA, Nijenhuis MV, Bueno-de-Mesquita JM, Retèl VP, van Harten WH, van Tinteren H, et al. Optimized outcome prediction in breast cancer by combining the 70-gene signature with clinical risk prediction algorithms. Breast Cancer Res Treat 2014;145:697–705. doi:10.1007/s10549-014-2954-2.

[67] Drukker CA, Elias SG, Nijenhuis MV, Wesseling J, Bartelink H, Elkhuizen P, et al. Gene expression profiling to predict the risk of locoregional recurrence in breast cancer: a pooled analysis. Breast Cancer Res Treat 2014;148:599–613. doi:10.1007/s10549-014-3188-z.

[68] Beumer IJ, Persoon M, Witteveen A, Dreezen C, Chin S-F, Sammut S-J, et al. Prognostic Value of MammaPrint(®) in Invasive Lobular Breast Cancer. Biomark Insights 2016;11:139–46. doi:10.4137/BMI.S38435.

[69] Saghatchian M, Mook S, Pruneri G, Viale G, Glas AM, Guerin S, et al. Additional prognostic value of the 70-gene signature (MammaPrint(®)) among breast cancer patients with 4-9 positive lymph nodes. Breast Edinb Scotl 2013;22:682–90. doi:10.1016/j.breast.2012.12.002.

[70] Straver ME, Glas AM, Hannemann J, Wesseling J, van de Vijver MJ, Rutgers EJT, et al. The 70-gene signature as a response predictor for neoadjuvant chemotherapy in breast cancer. Breast Cancer Res Treat 2010;119:551–8. doi:10.1007/s10549-009-0333-1.

[71] Esserman LJ, Berry DA, Cheang MCU, Yau C, Perou CM, Carey L, et al. Chemotherapy response and recurrence-free survival in neoadjuvant breast cancer depends on biomarker profiles: results from the I-SPY 1 TRIAL (CALGB 150007/150012; ACRIN 6657). Breast Cancer Res Treat 2012;132:1049–62. doi:10.1007/s10549-011-1895-2.

[72] Whitworth P, Beitsch P, Mislowsky A, Pellicane JV, Nash C, Murray M, et al. Chemosensitivity and Endocrine Sensitivity in Clinical Luminal Breast Cancer Patients in the Prospective Neoadjuvant Breast Registry Symphony Trial (NBRST) Predicted by Molecular Subtyping. Ann Surg Oncol 2017;24:669–75. doi:10.1245/s10434-016-5600-x.

[73] Filipits M, Rudas M, Jakesz R, Dubsky P, Fitzal F, Singer CF, et al. A new molecular predictor of distant recurrence in ER-positive, HER2-negative breast cancer adds independent information to conventional clinical risk factors. Clin Cancer Res Off J Am Assoc Cancer Res 2011;17:6012–20. doi:10.1158/1078-0432.CCR-11-0926.

[74] Dubsky P, Filipits M, Jakesz R, Rudas M, Singer CF, Greil R, et al. EndoPredict improves the prognostic classification derived from common clinical guidelines in ER-positive, HER2-negative early breast cancer. Ann Oncol Off J Eur Soc Med Oncol 2013;24:640–7. doi:10.1093/annonc/mds334.

[75] Zhao X, Rødland EA, Sørlie T, Vollan HKM, Russnes HG, Kristensen VN, et al. Systematic assessment of prognostic gene signatures for breast cancer shows distinct influence of time and ER status. BMC Cancer 2014;14:211. doi:10.1186/1471-2407-14-211.

[76] Martin M, Brase JC, Calvo L, Krappmann K, Ruiz-Borrego M, Fisch K, et al. Clinical validation of the EndoPredict test in node-positive, chemotherapy-treated ER+/HER2- breast cancer patients: results from the GEICAM 9906 trial. Breast Cancer Res BCR 2014;16:R38. doi:10.1186/bcr3642.

[77] Fitzal F, Filipits M, Rudas M, Greil R, Dietze O, Samonigg H, et al. The genomic expression test EndoPredict is a prognostic tool for identifying risk of local recurrence in postmenopausal endocrine receptor-positive, her2neu-negative breast cancer patients randomised within the prospective ABCSG 8 trial. Br J Cancer 2015;112:1405–10. doi:10.1038/bjc.2015.98.

[78] Buus R, Sestak I, Kronenwett R, Denkert C, Dubsky P, Krappmann K, et al. Comparison of EndoPredict and EPclin With Oncotype DX Recurrence Score for Prediction of Risk of Distant Recurrence After Endocrine Therapy. J Natl Cancer Inst 2016;108. doi:10.1093/jnci/djw149.

[79] Bertucci F, Finetti P, Viens P, Birnbaum D. EndoPredict predicts for the response to neoadjuvant chemotherapy in ER-positive, HER2-negative breast cancer. Cancer Lett 2014;355:70–5. doi:10.1016/j.canlet.2014.09.014.

[80] Chia SK, Bramwell VH, Tu D, Shepherd LE, Jiang S, Vickery T, et al. A 50-gene intrinsic subtype classifier for prognosis and prediction of benefit from adjuvant tamoxifen. Clin Cancer Res Off J Am Assoc Cancer Res 2012;18:4465–72. doi:10.1158/1078-0432.CCR-12-0286.

[81] Dowsett M, Sestak I, Lopez-Knowles E, Sidhu K, Dunbier AK, Cowens JW, et al. Comparison of PAM50 risk of recurrence score with oncotype DX and IHC4 for predicting risk of distant recurrence after endocrine therapy. J Clin Oncol Off J Am Soc Clin Oncol 2013;31:2783–90. doi:10.1200/JCO.2012.46.1558.

[82] Sestak I, Dowsett M, Zabaglo L, Lopez-Knowles E, Ferree S, Cowens JW, et al. Factors predicting late recurrence for estrogen receptor-positive breast cancer. J Natl Cancer Inst 2013;105:1504–11. doi:10.1093/jnci/djt244.

[83] Gnant M, Filipits M, Greil R, Stoeger H, Rudas M, Bago-Horvath Z, et al. Predicting distant recurrence in receptor-positive breast cancer patients with limited clinicopathological risk: using the PAM50 Risk of Recurrence score in 1478 postmenopausal patients of the ABCSG-8 trial treated with adjuvant endocrine therapy alone. Ann Oncol Off J Eur Soc Med Oncol 2014;25:339–45. doi:10.1093/annonc/mdt494.

[84] Filipits M, Nielsen TO, Rudas M, Greil R, Stöger H, Jakesz R, et al. The PAM50 Risk-of-Recurrence Score Predicts Risk for Late Distant Recurrence after Endocrine Therapy in Postmenopausal Women with Endocrine-Responsive Early Breast Cancer. Clin Cancer Res 2014;20:1298–305. doi:10.1158/1078-0432.CCR-13-1845.

[85] Sestak I, Cuzick J, Dowsett M, Lopez-Knowles E, Filipits M, Dubsky P, et al. Prediction of late distant recurrence after 5 years of endocrine treatment: a combined analysis of patients from the Austrian breast and colorectal cancer study group 8 and arimidex, tamoxifen alone or in combination randomized trials using the PAM50 risk of recurrence score. J Clin Oncol Off J Am Soc Clin Oncol 2015;33:916–22. doi:10.1200/JCO.2014.55.6894.

[86] Gnant M, Sestak I, Filipits M, Dowsett M, Balic M, Lopez-Knowles E, et al. Identifying clinically relevant prognostic subgroups of postmenopausal women with node-positive hormone receptor-positive early-stage breast cancer treated with endocrine therapy: a combined analysis of ABCSG-8 and ATAC using the PAM50 risk of recurrence score and intrinsic subtype. Ann Oncol Off J Eur Soc Med Oncol 2015;26:1685–91. doi:10.1093/annonc/mdv215.

[87] Martin M, Brase JC, Ruiz A, Prat A, Kronenwett R, Calvo L, et al. Prognostic ability of EndoPredict compared to research-based versions of the PAM50 risk of recurrence (ROR) scores in node-positive, estrogen receptor-positive, and HER2-negative breast cancer. A GEICAM/9906 sub-study. Breast Cancer Res Treat 2016;156:81–9. doi:10.1007/s10549-016-3725-z.

[88] Liu S, Chapman J-AW, Burnell MJ, Levine MN, Pritchard KI, Whelan TJ, et al. Prognostic and predictive investigation of PAM50 intrinsic subtypes in the NCIC CTG MA.21 phase III chemotherapy trial. Breast Cancer Res Treat 2015;149:439–48. doi:10.1007/s10549-014-3259-1.

[89] Parker JS, Mullins M, Cheang MCU, Leung S, Voduc D, Vickery T, et al. Supervised risk predictor of breast cancer based on intrinsic subtypes. J Clin Oncol Off J Am Soc Clin Oncol 2009;27:1160–7. doi:10.1200/JCO.2008.18.1370.

[90] Nielsen TO, Parker JS, Leung S, Voduc D, Ebbert M, Vickery T, et al. A comparison of PAM50 intrinsic subtyping with immunohistochemistry and clinical prognostic factors in tamoxifen-treated estrogen receptor-positive breast cancer. Clin Cancer Res Off J Am Assoc Cancer Res 2010;16:5222–32. doi:10.1158/1078-0432.CCR-10-1282.

[91] Cockburn JG, Hallett RM, Gillgrass AE, Dias KN, Whelan T, Levine MN, et al. The effects of lymph node status on predicting outcome in ER+ /HER2- tamoxifen treated breast cancer patients using gene signatures. BMC Cancer 2016;16:555. doi:10.1186/s12885-016-2501-0.

[92] Dunbier AK, Anderson H, Ghazoui Z, Salter J, Parker JS, Perou CM, et al. Association between breast cancer subtypes and response to neoadjuvant anastrozole. Steroids 2011;76:736–40. doi:10.1016/j.steroids.2011.02.025.

[93] Prat A, Galván P, Jimenez B, Buckingham W, Jeiranian HA, Schaper C, et al. Prediction of Response to Neoadjuvant Chemotherapy Using Core Needle Biopsy Samples with the Prosigna Assay. Clin Cancer Res Off J Am Assoc Cancer Res 2016;22:560–6. doi:10.1158/1078-0432.CCR-15-0630.
